# Supplementary material for: Antioxidant activity of NSAIDs-Se derivatives: predictive QSAR-machine learning models
Source: Royal Society of Chemistry journal article supplement (doi:10.1039/d4nj03216k), 2024-01-01
Supplement: d4nj03216k1.pdf [file d4nj03216k1.pdf]

## Supplementary Information

### Antioxidant Activity of NSAIDs-Se Derivatives: Predictive QSAR-Machine Learning Models

Zhihui Fu<sup>a</sup>, Amphawan Wiriyanattanakul<sup>b</sup>, Wanting Xie<sup>a</sup>, Pattamon Jantorn<sup>c,d</sup>,  
Borwornlak Toopradab<sup>c,d</sup>, Liyi Shi<sup>a,c</sup>, Thanyada Rungrotmongkol<sup>c,d\*</sup>, Phornphimon  
Maitarad<sup>a\*</sup>

<sup>a</sup> Research Center of Nano Science and Technology, College of Sciences, Shanghai University,  
Shanghai 200444, PR China

<sup>b</sup> Program in Chemistry, Faculty of Science and Technology, Uttaradit Rajabhat University, Uttaradit  
53000, Thailand

<sup>c</sup> Center of Excellence in Structural and Computational Biology, Department of Biochemistry,  
Chulalongkorn University, Bangkok 10330, Thailand

<sup>d</sup> Program in Bioinformatics and Computational Biology, Graduate School, Chulalongkorn University,  
Bangkok 10330, Thailand

<sup>e</sup> Emerging Industries Institute Shanghai University, Jiaxing, Zhejiang 314006, PR China

\* Corresponding authors [pmaitarad@shu.edu.cn](mailto:pmaitarad@shu.edu.cn) (P.M.) [t.rungrotmongkol@gmail.com](mailto:t.rungrotmongkol@gmail.com)  
(T.R.)

| No. | Contents                                                                                                                                                                    | Page    |
|-----|-----------------------------------------------------------------------------------------------------------------------------------------------------------------------------|---------|
| 1.  | Table S1. 87 descriptors used for construction of QSAR models.                                                                                                              | S3      |
| 2.  | Table S2. The definitions of 87 descriptors.                                                                                                                                | S4-S6   |
| 3.  | Table S3. The datasets of 36 studied compounds consisted of their Log[%DPPH] and molecular descriptors.                                                                     | S7-S11  |
| 4.  | Table S4. Hyperparameters to be tested for (a) RF and (b) ANN.                                                                                                              | S12     |
| 5   | Table S5. Experimental and predicted Log[%DPPH] values for the training set and test set of NSAID-Se Derivatives obtained from RF, ANN models.                              | S13     |
| 6.  | Figure S1. Comparison of experimental and the predicted values from RF <sub>KS</sub> and ANN <sub>KS</sub> models for 16 external set of synthesized NSAIDs-Se derivatives. | S14     |
| 7.  | Table S6. Five molecular descriptors of 16 new NSAIDs-Se derivatives.                                                                                                       | S15     |
| 8.  | Code S1. Python codes optimization of the QSAR models                                                                                                                       | S16-S24 |

**Table S1. 87 descriptors used for construction of QSAR models.**

| NO. | Descriptors                      | NO.  | Descriptors                             | NO.  | Descriptors                              |
|-----|----------------------------------|------|-----------------------------------------|------|------------------------------------------|
| X1  | Connolly surface area            | X30  | Chi (0)                                 | X59  | Molecular area (vdW area)                |
| X2  | Connolly surface occupied volume | X31  | Chi (1)                                 | X60  | Molecular volume (vdW area)              |
| X3  | Solvent surface area             | X32  | Chi (2)                                 | X61  | Molecular density                        |
| X4  | Solvent surface occupied volume  | X33  | Chi (3): path                           | X62  | Principal moments of inertia (magnitude) |
| X5  | Total molecular mass             | X34  | Chi (3): cluster                        | X63  | Principal moment of inertia X            |
| X6  | Atom count                       | X35  | Chi (0) (valence modified)              | X64  | Principal moment of inertia Y            |
| X7  | Element count                    | X36  | Chi (1) (valence modified)              | X65  | Principal moment of inertia Z            |
| X8  | Rotatable bonds                  | X37  | Chi (2) (valence modified)              | X66  | Radius of gyration                       |
| X9  | Hydrogen bond donor              | X38  | Chi (3): path (valence modified)        | X67  | Ellipsoidal volume                       |
| X10 | Hydrogen bond acceptor           | X39  | Chi (3): cluster (valence modified)     | X68  | Shadow area: XY plane                    |
| X11 | AlogP                            | X40  | Information content (IC)                | X69  | Shadow area: YZ plane                    |
| X12 | AlogP98                          | X41  | Bond information content (BIC)          | X70  | Shadow area: ZX plane                    |
| X13 | Molecular refractivity           | X42  | Complementary information content (CIC) | X71  | Shadow area fraction: XY plane           |
| X14 | Molecular flexibility            | X43  | Structural information content (SIC)    | X72  | Shadow area fraction: YZ plane           |
| X15 | Balaban index JX                 | X44  | Edge adjacency/magnitude                | X73  | Shadow area fraction: ZX plane           |
| X16 | Balaban index JY                 | X45  | Edge distance/magnitude                 | X74  | Shadow length: LX                        |
| X17 | Wiener index                     | X46  | Vertex adjacency/equality               | X75  | Shadow length: LY                        |
| X18 | Zagreb index                     | X47  | Vertex adjacency/magnitude              | X76  | Shadow length: LZ                        |
| X19 | Kappa-1                          | X48  | Vertex distance/equality                | X77  | Shadow ratio                             |
| X20 | Kappa-2                          | X49  | Vertex distance/magnitude               | X78  | Total dipole                             |
| X21 | Kappa-3                          | X50  | Atomic composition (total)              | X79  | Dipole x                                 |
| X22 | Kappa-1 (alpha modified)         | X51  | E-state keys (sums): S_aaCH             | X80* | <b>Dipole y</b>                          |
| X23 | Kappa-2 (alpha modified)         | X52  | E-state keys (sums): S_aasC             | X81  | Dipole z                                 |
| X24 | Kappa-3 (alpha modified)         | X53  | E-state keys (sums): S_dO               | X82* | <b>HOMO eigenvalue</b>                   |
| X25 | Subgraph counts (0): path        | X54* | <b>E-state keys (sums): S_dssC</b>      | X83  | LUMO eigenvalue                          |
| X26 | Subgraph counts (1): path        | X55* | <b>E-state keys (sums): S_sCH3</b>      | X84  | Mean polarizability                      |
| X27 | Subgraph counts (2): path        | X56  | E-state keys (sums): S_ssCH2            | X85  | Total energy                             |
| X28 | Subgraph counts (3): path        | X57  | Methoxy (Fragment Counts)               | X86  | Electronic energy                        |
| X29 | Subgraph counts (3): cluster     | X58  | Methyl (Fragment Counts)                | X87* | <b>Heat of formation</b>                 |

Eighty-seven molecular descriptors were calculated for a set of thirty-six NSAID-Se derivatives. \* represent selected descriptors to generate models.

**Table S2. The definitions of 87 descriptors.**

| NO.         | Definitions                                                                                                                                                                                                                                                                                                                                                                                                                                                                                                                                                                                                                                                                                                                                                                                                                                                                                                                                                                                                                                                                                    |
|-------------|------------------------------------------------------------------------------------------------------------------------------------------------------------------------------------------------------------------------------------------------------------------------------------------------------------------------------------------------------------------------------------------------------------------------------------------------------------------------------------------------------------------------------------------------------------------------------------------------------------------------------------------------------------------------------------------------------------------------------------------------------------------------------------------------------------------------------------------------------------------------------------------------------------------------------------------------------------------------------------------------------------------------------------------------------------------------------------------------|
| X1-X2       | Connolly surface: is at the boundary between the Connolly probe and the atoms (as represented by their scaled vdW radii), not at the locus of the probe center. Surface area: The surface area of an atom volume surface. Occupied volume: The volume on the atom side of the atom volume surface.                                                                                                                                                                                                                                                                                                                                                                                                                                                                                                                                                                                                                                                                                                                                                                                             |
| X3-X4       | Solvent surface: The surface which is the locus of the probe center as the probe rolls over the scaled vdW surface.                                                                                                                                                                                                                                                                                                                                                                                                                                                                                                                                                                                                                                                                                                                                                                                                                                                                                                                                                                            |
| X5-X6       | Total mass of the whole molecular.                                                                                                                                                                                                                                                                                                                                                                                                                                                                                                                                                                                                                                                                                                                                                                                                                                                                                                                                                                                                                                                             |
|             | Total number of atoms in the structure.                                                                                                                                                                                                                                                                                                                                                                                                                                                                                                                                                                                                                                                                                                                                                                                                                                                                                                                                                                                                                                                        |
| X7-X8       | Total number of atoms of specified type in the structure.                                                                                                                                                                                                                                                                                                                                                                                                                                                                                                                                                                                                                                                                                                                                                                                                                                                                                                                                                                                                                                      |
|             | Number of rotatable bonds.                                                                                                                                                                                                                                                                                                                                                                                                                                                                                                                                                                                                                                                                                                                                                                                                                                                                                                                                                                                                                                                                     |
| X9-         | Number of hydrogen-bond donors.                                                                                                                                                                                                                                                                                                                                                                                                                                                                                                                                                                                                                                                                                                                                                                                                                                                                                                                                                                                                                                                                |
| X10         | Number of hydrogen-bond acceptors.                                                                                                                                                                                                                                                                                                                                                                                                                                                                                                                                                                                                                                                                                                                                                                                                                                                                                                                                                                                                                                                             |
| X11-<br>X12 | Log of the partition coefficient (In this atom-based approach, each atom in the molecule is assigned to a particular class, with additive contributions to the total value of logP and the molar refractivity. For more information, see Leffler and Grunwald (1963))                                                                                                                                                                                                                                                                                                                                                                                                                                                                                                                                                                                                                                                                                                                                                                                                                          |
|             | X13                                                                                                                                                                                                                                                                                                                                                                                                                                                                                                                                                                                                                                                                                                                                                                                                                                                                                                                                                                                                                                                                                            |
| X14         | The molecular refractivity (m <sup>3</sup> /mol) index of a substituent is a combined measure of its size and polarizability.                                                                                                                                                                                                                                                                                                                                                                                                                                                                                                                                                                                                                                                                                                                                                                                                                                                                                                                                                                  |
| X15-<br>X16 | This descriptor is based on the structural properties that prevent a molecule from being "infinitely flexible", the model for which is an endless chain of C(sp <sup>3</sup> ) atoms.                                                                                                                                                                                                                                                                                                                                                                                                                                                                                                                                                                                                                                                                                                                                                                                                                                                                                                          |
|             | X17                                                                                                                                                                                                                                                                                                                                                                                                                                                                                                                                                                                                                                                                                                                                                                                                                                                                                                                                                                                                                                                                                            |
| X15-        | This is a highly discriminating descriptor whose values do not increase substantially with molecule size or the number of rings present (Balaban, 1982; Balaban and Ivanciuc, 1989).                                                                                                                                                                                                                                                                                                                                                                                                                                                                                                                                                                                                                                                                                                                                                                                                                                                                                                           |
| X16         | The Wiener index is the sum of the chemical bonds existing between all pairs of heavy atoms in the molecule. In graph-theoretical terms: the sum of lengths of minimal paths between all pairs of vertices representing heavy atoms. This is equal to half the sum of all D-matrix entries.                                                                                                                                                                                                                                                                                                                                                                                                                                                                                                                                                                                                                                                                                                                                                                                                    |
|             | X18                                                                                                                                                                                                                                                                                                                                                                                                                                                                                                                                                                                                                                                                                                                                                                                                                                                                                                                                                                                                                                                                                            |
| X17         | The Zagreb index is defined as the sum of the squares of vertex valencies.                                                                                                                                                                                                                                                                                                                                                                                                                                                                                                                                                                                                                                                                                                                                                                                                                                                                                                                                                                                                                     |
| X19-<br>X21 | These indices compare the molecule graph with "minimal" and "maximal" graphs, where the meaning of "minimal" and "maximal" depends on the order, n. These are intended to capture different aspects of the molecular shape.                                                                                                                                                                                                                                                                                                                                                                                                                                                                                                                                                                                                                                                                                                                                                                                                                                                                    |
|             | X22-                                                                                                                                                                                                                                                                                                                                                                                                                                                                                                                                                                                                                                                                                                                                                                                                                                                                                                                                                                                                                                                                                           |
| X24         | These indices are refinements of the shape indices described above that take into consideration the contribution made by covalent radii and hybridization to the shape of the molecule.                                                                                                                                                                                                                                                                                                                                                                                                                                                                                                                                                                                                                                                                                                                                                                                                                                                                                                        |
| X25-<br>X39 | "This index, refined by Kier and Hall (1976), is a series of numbers designated by order and subgraph type. There are four subgraph types: Path, Cluster, Path/Cluster, and Chain. These types emphasize different aspects of atom connectivity within a molecule (the amount of branching ring structures present and flexibility). Here, these subgraph types are referred to as P, C, PC, and CH, respectively. They are defined as follows:<br>Given a connected subgraph:<br>If G contains a cycle, it is of type CH (chain).<br>Otherwise:<br>If all vertex valencies of G (valencies with respect to G, not the entire graph) are either greater than 2 or equal to 1, G is of type C (cluster).<br>Otherwise:<br>If all vertex valencies (as above) are either equal to 2 or 1, G is of type P (path).<br>Otherwise:<br>G is of type PC (Path/Cluster). That means the valencies greater than 2, equal to 2, and equal to 1, are all present. The order refers to the number of edges in a subgraph. Allowable orders are 0, 1, ..., M (M = the number of edges in the entire graph)." |
|             | X25-                                                                                                                                                                                                                                                                                                                                                                                                                                                                                                                                                                                                                                                                                                                                                                                                                                                                                                                                                                                                                                                                                           |

|                            |                                                                                                                                                                                                                                                                                                                                                                                                                                                                                                                                                                                                                                                                                                                                                                                                                                                                                                                                                                                                                                                                                                                                                                                                                                                                                                                                                                                                                                                                                                                                                                                                                                                                                                                                                                                                                                                                                                                                             |
|----------------------------|---------------------------------------------------------------------------------------------------------------------------------------------------------------------------------------------------------------------------------------------------------------------------------------------------------------------------------------------------------------------------------------------------------------------------------------------------------------------------------------------------------------------------------------------------------------------------------------------------------------------------------------------------------------------------------------------------------------------------------------------------------------------------------------------------------------------------------------------------------------------------------------------------------------------------------------------------------------------------------------------------------------------------------------------------------------------------------------------------------------------------------------------------------------------------------------------------------------------------------------------------------------------------------------------------------------------------------------------------------------------------------------------------------------------------------------------------------------------------------------------------------------------------------------------------------------------------------------------------------------------------------------------------------------------------------------------------------------------------------------------------------------------------------------------------------------------------------------------------------------------------------------------------------------------------------------------|
| <p><b>X40-<br/>X43</b></p> | <p>"To determine information-content descriptors, molecules are viewed as structures that can be partitioned into subsets of elements that are in some sense equivalent. The notion of equivalence depends on the particular descriptor. Consider a partition of a set of N elements into k subsets each consisting of N<sub>k</sub> elements<br/> Multigraph information content indices (IC, BIC, CIC, SIC)<br/> To each vertex v, an unordered sequence of ordered pairs, called a coordinate, is assigned:<br/> { (m<sub>1</sub>, n<sub>1</sub>), (m<sub>2</sub>, n<sub>2</sub>), ... , (m<sub>k</sub>, n<sub>k</sub>) }</p> <p>Where k is the valence of the vertex. There is one ordered pair (m<sub>j</sub>, n<sub>j</sub>) per each neighboring vertex, v<sub>j</sub>) and for every j = 1, ..., k:</p> <p>The valence of v<sub>j</sub> is n<sub>j</sub><br/> The bond between v and v<sub>j</sub> is of order m<sub>j</sub><br/> Having assigned the coordinates to vertices, the partition of vertices is constructed in the usual way, where two vertices are considered equivalent if their coordinates are the same (as unordered k-tuples, i.e., the repetitions of ordered pairs are not ignored, as they would be if the k-tuples were treated purely as sets).</p> <p>The index corresponding directly to this partition is the index IC ("Information Content").</p> <p>The following indices are normalizations of IC:</p> <p>BIC = IC / lb(number of bonds counting bond orders) - Bonding Information Content<br/> SIC = IC / lb(number of vertices) - Structural Information Content<br/> The CIC (Complementary Information Content) measures the deviation of IC from its maximum possible value corresponding to the partition into classes containing one element each:</p> $IC_{max} = -N \times (1/N) \times \text{lb}(1/N) = \text{lb}(N)$ <p>and thus the CIC index is defined as:<br/> CIC = lb(N) - IC"</p> |
| <p><b>X44-<br/>X50</b></p> | <p>"Distance measurement - Each of the distance measurements found in the structure is listed in the form of an array of name/value pairs<br/> Distance count - The total number of distance measurements found in the structure<br/> Angle measurement - Each of the angle measurements found in the structure is listed in the form of an array of name/value pairs<br/> Angle count - The total number of angle measurements found in the structure<br/> Torsion measurement - Each of the torsion measurements found in the structure is listed in the form of an array of name/value pairs<br/> Torsion count - The total number of torsion measurements found in the structure"</p>                                                                                                                                                                                                                                                                                                                                                                                                                                                                                                                                                                                                                                                                                                                                                                                                                                                                                                                                                                                                                                                                                                                                                                                                                                                   |
| <p><b>X51-<br/>X56</b></p> | <p>"Electrotopological state keys are numerical values, computed for each atom in a molecule, which encode information about both the topological environment of that atom and the electronic interactions due to all other atoms in the molecule (Hall and Kier, 1995).</p> <p>The topological part of the relationship is based on the graph distances between each atom and all other atoms in the molecule. The electronic part is based on an intrinsic state value, plus perturbation due to intrinsic state differences between atoms in the molecule.</p> <p>In Materials Studio QSAR, E-states with the following symbols are calculated for each molecule:<br/> I<sub>xxx</sub> - Indicator for type xxx (presence/absence, 0/1)<br/> N<sub>xxx</sub> - Counter for type xxx (number of times it appears in the molecule)<br/> S<sub>xxx</sub> - Sum for type xxx (the actual E-state key as defined by the formulas above)<br/> where the xxx types are:</p> <p>s - single bond<br/> d - double bond<br/> t - triple bond<br/> a - aromatic bond</p> <p>For example, S<sub>aaC</sub> is the sum descriptor for carbon with two aromatic bonds and one single bond. N<sub>sNH2</sub> is the counter descriptor for a N bonded to two hydrogens and a single bond."</p>                                                                                                                                                                                                                                                                                                                                                                                                                                                                                                                                                                                                                                                            |
| <p><b>X57-<br/>X58</b></p> | <p>The fragment counting model allows you to determine the number of a specified fragments contained within a structure, using the pattern matching algorithm in Materials Visualizer. The algorithm searches for matches based on topology, element type and bond order.<br/> Hydrocarbons - Fragment counts for a range of hydrocarbon fragments<br/> Functional groups - Fragment counts for a range of functional groups</p>                                                                                                                                                                                                                                                                                                                                                                                                                                                                                                                                                                                                                                                                                                                                                                                                                                                                                                                                                                                                                                                                                                                                                                                                                                                                                                                                                                                                                                                                                                            |
| <p><b>X59</b></p>          | <p>Molecular area (vdW area) - describes the van der Waals area of a molecule. The molecular surface area determines the extent to which a molecule exposes itself to the external environment. This descriptor is related to binding, transport, and solubility.</p>                                                                                                                                                                                                                                                                                                                                                                                                                                                                                                                                                                                                                                                                                                                                                                                                                                                                                                                                                                                                                                                                                                                                                                                                                                                                                                                                                                                                                                                                                                                                                                                                                                                                       |

|                     |                                                                                                                                                                                                                                                                                                                                                                                                                                                                                                                                                                                                                                                                                                                                                                                                                                                                                                                                                                                                                                                                                                                                                                                                                                                                                                                                                                                                                                                                      |
|---------------------|----------------------------------------------------------------------------------------------------------------------------------------------------------------------------------------------------------------------------------------------------------------------------------------------------------------------------------------------------------------------------------------------------------------------------------------------------------------------------------------------------------------------------------------------------------------------------------------------------------------------------------------------------------------------------------------------------------------------------------------------------------------------------------------------------------------------------------------------------------------------------------------------------------------------------------------------------------------------------------------------------------------------------------------------------------------------------------------------------------------------------------------------------------------------------------------------------------------------------------------------------------------------------------------------------------------------------------------------------------------------------------------------------------------------------------------------------------------------|
| <b>X60</b>          | Molecular volume (vdW volume) - describes the volume inside the van der Waals area of a molecule. Molecular volume is related to binding and transport.                                                                                                                                                                                                                                                                                                                                                                                                                                                                                                                                                                                                                                                                                                                                                                                                                                                                                                                                                                                                                                                                                                                                                                                                                                                                                                              |
| <b>X61</b>          | Molecular density - defined as the ratio of molecular weight to molecular volume. It has units of g ml <sup>-1</sup> . The molecular density reflects the types of atoms and how tightly they are packed in a molecule. It can be related to transport and melt behavior.                                                                                                                                                                                                                                                                                                                                                                                                                                                                                                                                                                                                                                                                                                                                                                                                                                                                                                                                                                                                                                                                                                                                                                                            |
| <b>X62-<br/>X65</b> | <p>"These descriptors calculate the principal moments of inertia of a molecule according to the following rules:<br/>The moment of inertia of a molecule about a given axis is given by:</p> $I = \sum m_i d_i^2$ <p>where di is the perpendicular distance from each atom to the axis.<br/>The principal moments of inertia of a molecule are the moments of inertia about each of the principal axes of the molecule.<br/>The principal moments of inertia and the principal axes of the molecule are the eigenvalues and eigenvectors of the inertia tensor of the system.<br/>If all three moments are equal, the molecule is considered to be a spherical top. If two moments are equal, the molecule is considered to be a symmetrical top. If no moments are equal, the molecule is considered to be an asymmetrical top.</p> <p>Principal moments of inertia (magnitude) - the magnitude of the principal moments of inertia<br/>Principal moment of inertia X - the moment of inertia about the longest principal axis<br/>Principal moment of inertia Y - the moment of inertia about the intermediate principal axis<br/>Principal moment of inertia Z - the moment of inertia about the shortest principal axis<br/>These descriptors are calculated in units of amu Å<sup>2</sup></p> <p>For more information about this descriptor, see Hill (1960)."</p>                                                                                              |
| <b>X66</b>          | <p>where N is the number of atoms and x, y, and z are the atomic coordinates relative to the center of mass.</p> $x^2 + y^2 + z^2 = \frac{1}{N} \sum_{i=1}^N (x_i^2 + y_i^2 + z_i^2)$                                                                                                                                                                                                                                                                                                                                                                                                                                                                                                                                                                                                                                                                                                                                                                                                                                                                                                                                                                                                                                                                                                                                                                                                                                                                                |
| <b>X67</b>          | Ellipsoidal volume - describes the volume of the ellipsoid of inertia derived from the inertia tensor of the system. This has axes proportional to the inverse of the square root of the principal moments of inertia, aligned along the principal axes.                                                                                                                                                                                                                                                                                                                                                                                                                                                                                                                                                                                                                                                                                                                                                                                                                                                                                                                                                                                                                                                                                                                                                                                                             |
| <b>X68-<br/>X77</b> | <p>This set of geometric descriptors helps to characterize the shape of the molecules. The descriptors are calculated by projecting the molecular surface on three mutually perpendicular planes, xy, yz, and xz (Rohrbaugh and Jurs, 1987). These descriptors depend not only on conformation, but also on the orientation of the molecule. To calculate them, the molecules are first rotated to align the principal moments of inertia with the x, y, and z axes.<br/>A total of 10 descriptors are calculated in this set:</p> <p>Shadow area: XY plane -area of the molecular shadow in the xy plane (Sxy).<br/>Shadow area: YZ plane -area of the molecular shadow in the yz plane (Syz).<br/>Shadow area: ZX plane -area of the molecular shadow in the xz plane (Sxz).<br/>Shadow area fraction: XY plane - fraction of area of molecular shadow in the xy plane over area of enclosing rectangle (Sxy,f).<br/>Shadow area fraction: YZ plane - fraction of area of molecular shadow in the yz plane over area of enclosing rectangle (Syz,f).<br/>Shadow area fraction: ZX plane - fraction of area of molecular shadow in the xz plane over area of enclosing rectangle (Sxz,f).<br/>Shadow length: LX -length of molecule in the x dimension (Lx).<br/>Shadow length: LY -length of molecule in the y dimension (Ly).<br/>Shadow length: LZ -length of molecule in the z dimension (Lz).<br/>Shadow ratio -ratio of largest to smallest dimension (δ)</p> |
| <b>X78-<br/>X81</b> | <p>These descriptors calculate the molecular dipole moments from partial charges defined on the atoms of the molecule. If no partial charges are defined, the molecular dipole moment will be zero.</p> <p>Dipole moment (magnitude) - the magnitude of the dipole moment<br/>Dipole moment X - the dipole moment about the X axis<br/>Dipole moment Y - the dipole moment about the Y axis<br/>Dipole moment Z - the dipole moment about the Z axis</p>                                                                                                                                                                                                                                                                                                                                                                                                                                                                                                                                                                                                                                                                                                                                                                                                                                                                                                                                                                                                             |
| <b>X82-<br/>X87</b> | The VAMP electrostatics model allows to calculate a variety of descriptors using the VAMP semiempirical molecular orbital code. Energy - Total energy (eV), electronic energy (eV), and heat of formation (kcal/mol)<br>Orbitals - HOMO eigenvalue and LUMO eigenvalue (eV)                                                                                                                                                                                                                                                                                                                                                                                                                                                                                                                                                                                                                                                                                                                                                                                                                                                                                                                                                                                                                                                                                                                                                                                          |

**Table S3.** The datasets of 36 studied compounds consisted of their Log[%DPPH] and molecular descriptors.

| Structures | Log[%DPPH] | X1      | X2      | X3      | X4       | X5      | X6    | X7   | X8  | X9     | X10    |
|------------|------------|---------|---------|---------|----------|---------|-------|------|-----|--------|--------|
| cpd1       | 1.326      | 423.972 | 461.157 | 692.706 | 1256.065 | 501.478 | 54    | 24   | 10  | 1      | 4      |
| cpd2       | 1.423      | 328.119 | 362.770 | 557.350 | 990.437  | 386.357 | 45    | 19   | 9   | 2      | 2      |
| cpd3       | 1.695      | 385.247 | 424.755 | 640.654 | 1155.426 | 502.860 | 53    | 23   | 11  | 1      | 5      |
| cpd4       | 1.483      | 348.140 | 382.812 | 573.262 | 1038.510 | 399.352 | 45    | 20   | 10  | 1      | 3      |
| cpd5       | 1.354      | 360.770 | 348.497 | 633.178 | 1052.946 | 375.330 | 43    | 18   | 9   | 1      | 3      |
| cpd6       | 1.389      | 382.249 | 413.027 | 639.973 | 1138.581 | 432.426 | 54    | 21   | 10  | 2      | 3      |
| cpd7       | 1.784      | 339.331 | 344.480 | 584.257 | 1002.412 | 351.352 | 45    | 17   | 10  | 1      | 2      |
| cpd8       | 1.717      | 266.533 | 284.394 | 471.036 | 805.652  | 325.226 | 33    | 13   | 9   | 1      | 4      |
| cpd9       | 1.516      | 431.330 | 481.526 | 707.188 | 1291.272 | 544.465 | 56    | 24   | 9   | 1      | 6      |
| cpd10      | 1.607      | 351.783 | 377.623 | 588.553 | 1045.750 | 432.319 | 45    | 19   | 8   | 1      | 5      |
| cpd11      | 1.59       | 316.259 | 360.733 | 537.194 | 963.898  | 429.344 | 47    | 19   | 8   | 2      | 4      |
| cpd12      | 1.412      | 411.137 | 466.236 | 663.501 | 1230.216 | 545.847 | 55    | 23   | 10  | 1      | 7      |
| cpd13      | 1.685      | 358.160 | 391.341 | 587.413 | 1061.050 | 442.339 | 47    | 20   | 9   | 1      | 5      |
| cpd14      | 1.571      | 360.135 | 366.818 | 621.699 | 1061.864 | 418.317 | 45    | 18   | 8   | 1      | 5      |
| cpd15      | 1.428      | 401.823 | 430.071 | 667.655 | 1190.362 | 475.413 | 56    | 21   | 9   | 2      | 5      |
| cpd16      | 1.838      | 324.694 | 364.095 | 545.797 | 979.583  | 394.339 | 47    | 17   | 9   | 1      | 4      |
| cpd17      | 1.86       | 287.010 | 296.026 | 505.461 | 855.802  | 368.213 | 35    | 13   | 8   | 1      | 6      |
| cpd18      | 1.494      | 332.133 | 361.361 | 559.725 | 994.681  | 366.363 | 47    | 18   | 11  | 0      | 3      |
| cpd19      | 1.646      | 450.976 | 463.926 | 748.474 | 1316.138 | 517.871 | 55    | 24   | 12  | 0      | 6      |
| cpd20      | 1.471      | 360.851 | 376.782 | 600.000 | 1058.125 | 401.368 | 47    | 20   | 10  | 1      | 3      |
| cpd21      | 1.483      | 388.070 | 426.976 | 642.384 | 1158.120 | 447.437 | 56    | 22   | 11  | 1      | 4      |
| cpd22      | 1.391      | 347.419 | 355.186 | 604.510 | 1029.293 | 433.328 | 47    | 19   | 9   | 0      | 6      |
| cpd23      | 1.712      | 368.763 | 381.998 | 629.165 | 1093.143 | 441.311 | 44    | 19   | 10  | 1      | 6      |
| cpd24      | 1.66       | 460.023 | 473.854 | 765.545 | 1342.057 | 516.489 | 56    | 25   | 11  | 0      | 5      |
| cpd25      | 1.757      | 406.120 | 380.725 | 716.586 | 1174.646 | 414.363 | 47    | 21   | 11  | 0      | 4      |
| cpd26      | 1.436      | 274.787 | 298.290 | 482.778 | 833.544  | 340.237 | 35    | 14   | 10  | 0      | 5      |
| cpd27      | 1.866      | 369.102 | 383.842 | 633.554 | 1093.757 | 447.330 | 47    | 20   | 9   | 0      | 6      |
| cpd28      | 1.686      | 333.824 | 371.499 | 559.822 | 1005.289 | 409.350 | 49    | 18   | 10  | 0      | 5      |
| cpd29      | 1.563      | 459.660 | 482.946 | 757.061 | 1345.291 | 560.858 | 57    | 24   | 11  | 0      | 8      |
| cpd30      | 1.367      | 384.393 | 393.538 | 650.604 | 1128.415 | 444.355 | 49    | 20   | 9   | 1      | 5      |
| cpd31      | 1.617      | 399.901 | 437.678 | 662.314 | 1191.304 | 490.424 | 58    | 22   | 10  | 1      | 6      |
| cpd32      | 1.568      | 341.714 | 369.234 | 582.533 | 1025.479 | 390.341 | 45    | 19   | 10  | 0      | 4      |
| cpd33      | 1.836      | 353.615 | 398.450 | 590.473 | 1069.566 | 484.298 | 46    | 19   | 9   | 1      | 8      |
| cpd34      | 1.652      | 465.056 | 488.434 | 768.722 | 1365.834 | 559.476 | 58    | 25   | 10  | 0      | 7      |
| cpd35      | 1.822      | 406.591 | 395.124 | 704.546 | 1182.173 | 457.350 | 49    | 21   | 10  | 0      | 6      |
| cpd36      | 1.511      | 273.660 | 272.728 | 492.027 | 815.012  | 369.197 | 34    | 13   | 8   | 0      | 7      |
| Structures | Log[%DPPH] | X11     | X12     | X13     | X14      | X15     | X16   | X17  | X18 | X19    | X20    |
| cpd1       | 1.326      | 4.328   | 4.688   | 124.902 | 7.562    | 1.808   | 1.850 | 3001 | 156 | 25.620 | 12.459 |
| cpd2       | 1.423      | 3.472   | 4.339   | 104.032 | 6.387    | 2.037   | 2.079 | 1507 | 114 | 20.314 | 10.871 |
| cpd3       | 1.695      | 2.084   | 3.614   | 123.955 | 7.454    | 1.834   | 1.900 | 2854 | 156 | 25.620 | 12.459 |
| cpd4       | 1.483      | 3.002   | 3.718   | 105.163 | 6.912    | 1.973   | 2.009 | 1752 | 118 | 21.302 | 11.658 |
| cpd5       | 1.354      | 2.530   | 4.853   | 97.501  | 6.131    | 2.028   | 2.075 | 1414 | 110 | 19.326 | 10.096 |
| cpd6       | 1.389      | 1.432   | 3.794   | 112.285 | 6.178    | 1.751   | 1.803 | 1931 | 138 | 21.703 | 10.156 |
| cpd7       | 1.784      | 3.371   | 3.964   | 93.379  | 7.531    | 2.399   | 2.434 | 1162 | 94  | 19.048 | 10.680 |
| cpd8       | 1.717      | 0.785   | 1.584   | 76.596  | 6.267    | 2.462   | 2.568 | 824  | 84  | 17.053 | 9.834  |
| cpd9       | 1.516      | 5.966   | 6.792   | 125.512 | 7.917    | 1.718   | 1.775 | 3645 | 170 | 27.585 | 12.301 |
| cpd10      | 1.607      | 5.243   | 6.141   | 100.549 | 6.774    | 1.852   | 1.918 | 2027 | 128 | 22.291 | 10.519 |
| cpd11      | 1.59       | 5.111   | 6.443   | 104.641 | 6.661    | 1.93    | 1.997 | 1923 | 128 | 22.291 | 10.519 |
| cpd12      | 1.412      | 3.723   | 5.718   | 124.564 | 7.812    | 1.742   | 1.821 | 3480 | 170 | 27.585 | 12.301 |
| cpd13      | 1.685      | 4.641   | 5.822   | 105.772 | 7.16     | 1.875   | 1.934 | 2214 | 132 | 23.281 | 11.253 |
| cpd14      | 1.571      | 4.169   | 6.957   | 98.110  | 6.419    | 1.901   | 1.972 | 1818 | 124 | 21.302 | 9.796  |
| cpd15      | 1.428      | 4.099   | 5.987   | 113.229 | 6.562    | 1.66    | 1.727 | 2429 | 152 | 23.659 | 10.080 |
| cpd16      | 1.838      | 5.010   | 6.068   | 93.988  | 7.592    | 2.305   | 2.380 | 1514 | 108 | 21.043 | 10.096 |
| cpd17      | 1.86       | 2.423   | 3.688   | 77.205  | 6.356    | 2.342   | 2.483 | 1106 | 98  | 19.048 | 9.209  |
| cpd18      | 1.494      | 4.185   | 4.857   | 96.004  | 8.468    | 2.305   | 2.353 | 1361 | 98  | 20.045 | 11.523 |
| cpd19      | 1.646      | 3.130   | 4.718   | 126.606 | 8.179    | 1.761   | 1.829 | 3210 | 160 | 26.602 | 13.185 |
| cpd20      | 1.471      | 4.054   | 5.021   | 106.632 | 7.184    | 1.944   | 1.994 | 1744 | 118 | 21.302 | 11.658 |
| cpd21      | 1.483      | 2.334   | 4.763   | 115.090 | 6.876    | 1.667   | 1.722 | 2215 | 142 | 22.680 | 10.858 |
| cpd22      | 1.391      | 4.983   | 7.850   | 100.735 | 7.172    | 1.812   | 1.889 | 2091 | 128 | 22.291 | 10.519 |
| cpd23      | 1.712      | 4.003   | 4.991   | 102.523 | 7.381    | 1.939   | 2.026 | 2168 | 130 | 23.281 | 11.870 |
| cpd24      | 1.66       | 5.374   | 5.792   | 127.554 | 8.291    | 1.736   | 1.782 | 3366 | 160 | 26.602 | 13.185 |
| cpd25      | 1.757      | 3.817   | 4.611   | 107.788 | 7.726    | 1.889   | 1.931 | 2014 | 122 | 22.291 | 12.457 |
| cpd26      | 1.436      | 1.367   | 2.266   | 79.195  | 7.185    | 2.346   | 2.461 | 984  | 88  | 18.050 | 10.688 |
| cpd27      | 1.866      | 6.058   | 7.205   | 103.174 | 7.536    | 1.798   | 1.871 | 2320 | 132 | 23.281 | 11.253 |
| cpd28      | 1.686      | 5.824   | 6.961   | 96.613  | 8.463    | 2.223   | 2.309 | 1753 | 112 | 22.042 | 10.871 |
| cpd29      | 1.563      | 4.769   | 6.821   | 127.215 | 8.515    | 1.673   | 1.754 | 3896 | 174 | 28.569 | 12.992 |
| cpd30      | 1.367      | 5.693   | 7.125   | 107.241 | 7.419    | 1.847   | 1.920 | 2206 | 132 | 23.281 | 11.253 |
| cpd31      | 1.617      | 3.972   | 6.867   | 115.699 | 7.239    | 1.57    | 1.640 | 2765 | 156 | 24.639 | 10.745 |
| cpd32      | 1.568      | 3.345   | 5.746   | 100.126 | 6.923    | 1.922   | 1.976 | 1643 | 114 | 20.314 | 10.871 |

|            |            |        |        |         |       |        |        |        |       |        |        |
|------------|------------|--------|--------|---------|-------|--------|--------|--------|-------|--------|--------|
| cpd33      | 1.836      | 5.641  | 7.745  | 103.132 | 7.664 | 1.861  | 1.966  | 2698   | 144   | 25.262 | 11.571 |
| cpd34      | 1.652      | 7.013  | 7.896  | 128.163 | 8.624 | 1.651  | 1.711  | 4070   | 174   | 28.569 | 12.992 |
| cpd35      | 1.822      | 5.455  | 6.714  | 108.397 | 7.933 | 1.8    | 1.865  | 2524   | 136   | 24.271 | 12.000 |
| cpd36      | 1.511      | 3.073  | 4.335  | 75.255  | 6.513 | 2.326  | 2.489  | 1106   | 98    | 19.048 | 9.209  |
| Structures | Log[%DPPH] | X21    | X22    | X23     | X24   | X25    | X26    | X27    | X28   | X29    | X30    |
| cpd1       | 1.326      | 6.992  | 22.670 | 10.340  | 5.574 | 31     | 33     | 45     | 58    | 10     | 22.380 |
| cpd2       | 1.423      | 6.353  | 17.552 | 8.733   | 4.848 | 24     | 25     | 32     | 40    | 6      | 17.364 |
| cpd3       | 1.695      | 6.533  | 22.543 | 10.251  | 5.134 | 31     | 33     | 45     | 60    | 10     | 22.380 |
| cpd4       | 1.483      | 6.910  | 18.409 | 9.386   | 5.287 | 25     | 26     | 33     | 41    | 6      | 18.071 |
| cpd5       | 1.354      | 5.786  | 16.981 | 8.305   | 4.542 | 23     | 24     | 31     | 39    | 6      | 16.656 |
| cpd6       | 1.389      | 4.776  | 19.442 | 8.579   | 3.863 | 27     | 29     | 40     | 56    | 10     | 19.278 |
| cpd7       | 1.784      | 7.705  | 17.232 | 9.178   | 6.442 | 21     | 21     | 26     | 29    | 5      | 15.665 |
| cpd8       | 1.717      | 6.817  | 14.869 | 8.008   | 5.319 | 19     | 19     | 23     | 26    | 4      | 14.088 |
| cpd9       | 1.516      | 8.000  | 24.923 | 10.482  | 6.646 | 33     | 35     | 50     | 60    | 14     | 24.173 |
| cpd10      | 1.607      | 7.510  | 19.948 | 8.829   | 6.146 | 26     | 27     | 37     | 42    | 10     | 19.156 |
| cpd11      | 1.59       | 7.510  | 19.820 | 8.738   | 6.073 | 26     | 27     | 37     | 42    | 10     | 19.156 |
| cpd12      | 1.412      | 7.492  | 24.796 | 10.397  | 6.146 | 33     | 35     | 50     | 62    | 14     | 24.173 |
| cpd13      | 1.685      | 8.100  | 20.679 | 9.348   | 6.549 | 27     | 28     | 38     | 43    | 10     | 19.864 |
| cpd14      | 1.571      | 6.910  | 19.247 | 8.338   | 5.742 | 25     | 26     | 36     | 41    | 10     | 18.449 |
| cpd15      | 1.428      | 5.627  | 21.683 | 8.776   | 4.767 | 29     | 31     | 45     | 58    | 14     | 21.071 |
| cpd16      | 1.838      | 9.157  | 19.527 | 8.942   | 8.048 | 23     | 23     | 31     | 31    | 9      | 17.458 |
| cpd17      | 1.86       | 8.265  | 17.162 | 7.777   | 6.894 | 21     | 21     | 28     | 28    | 8      | 15.880 |
| cpd18      | 1.494      | 9.037  | 18.389 | 10.131  | 7.803 | 22     | 22     | 27     | 29    | 5      | 16.372 |
| cpd19      | 1.646      | 7.014  | 23.678 | 11.053  | 5.643 | 32     | 34     | 46     | 61    | 10     | 23.087 |
| cpd20      | 1.471      | 7.260  | 18.695 | 9.606   | 5.736 | 25     | 26     | 33     | 40    | 6      | 18.071 |
| cpd21      | 1.483      | 5.202  | 20.571 | 9.358   | 4.316 | 28     | 30     | 41     | 57    | 10     | 19.985 |
| cpd22      | 1.391      | 7.881  | 20.393 | 9.144   | 6.729 | 26     | 27     | 37     | 41    | 10     | 19.156 |
| cpd23      | 1.712      | 8.490  | 20.462 | 9.739   | 6.756 | 27     | 28     | 37     | 42    | 9      | 19.700 |
| cpd24      | 1.66       | 7.498  | 23.806 | 11.144  | 6.114 | 32     | 34     | 46     | 59    | 10     | 23.087 |
| cpd25      | 1.757      | 7.881  | 19.553 | 10.273  | 6.239 | 26     | 27     | 34     | 41    | 6      | 18.778 |
| cpd26      | 1.436      | 8.148  | 16.026 | 8.967   | 6.645 | 20     | 20     | 24     | 26    | 4      | 14.795 |
| cpd27      | 1.866      | 8.490  | 21.094 | 9.646   | 7.134 | 27     | 28     | 38     | 42    | 10     | 19.864 |
| cpd28      | 1.686      | 10.576 | 20.684 | 9.820   | 9.524 | 24     | 24     | 32     | 31    | 9      | 18.165 |
| cpd29      | 1.563      | 7.998  | 25.934 | 11.164  | 6.691 | 34     | 36     | 51     | 63    | 14     | 24.880 |
| cpd30      | 1.367      | 8.490  | 20.966 | 9.554   | 7.057 | 27     | 28     | 38     | 42    | 10     | 19.864 |
| cpd31      | 1.617      | 6.081  | 22.817 | 9.518   | 5.261 | 30     | 32     | 46     | 59    | 14     | 21.778 |
| cpd32      | 1.568      | 6.682  | 18.123 | 9.167   | 5.432 | 24     | 25     | 32     | 39    | 6      | 17.364 |
| cpd33      | 1.836      | 9.777  | 22.736 | 9.776   | 8.146 | 29     | 30     | 42     | 44    | 13     | 21.493 |
| cpd34      | 1.652      | 8.531  | 26.062 | 11.250  | 7.222 | 34     | 36     | 51     | 61    | 14     | 24.880 |
| cpd35      | 1.822      | 9.140  | 21.826 | 10.178  | 7.594 | 28     | 29     | 39     | 43    | 10     | 20.571 |
| cpd36      | 1.511      | 8.265  | 17.322 | 7.896   | 7.008 | 21     | 21     | 28     | 28    | 8      | 15.880 |
| Structures | Log[%DPPH] | X31    | X32    | X33     | X34   | X35    | X36    | X37    | X38   | X39    | X40    |
| cpd1       | 1.326      | 14.901 | 13.237 | 10.583  | 2.018 | 19.935 | 13.462 | 10.420 | 7.365 | 1.115  | 4.285  |
| cpd2       | 1.423      | 11.630 | 9.652  | 7.943   | 1.133 | 15.640 | 9.913  | 7.313  | 5.124 | 0.537  | 3.605  |
| cpd3       | 1.695      | 14.956 | 12.938 | 10.854  | 1.852 | 19.744 | 12.163 | 9.196  | 6.540 | 0.851  | 4.107  |
| cpd4       | 1.483      | 12.130 | 9.983  | 8.296   | 1.121 | 15.780 | 10.183 | 7.472  | 5.170 | 0.517  | 3.574  |
| cpd5       | 1.354      | 11.151 | 9.220  | 7.744   | 1.132 | 15.048 | 9.585  | 7.124  | 5.056 | 0.534  | 3.708  |
| cpd6       | 1.389      | 13.147 | 11.053 | 9.643   | 1.591 | 17.774 | 11.761 | 8.783  | 6.727 | 0.831  | 4.06   |
| cpd7       | 1.784      | 10.041 | 8.450  | 6.100   | 1.207 | 14.769 | 9.485  | 7.491  | 4.609 | 0.826  | 3.463  |
| cpd8       | 1.717      | 9.147  | 7.518  | 5.236   | 0.947 | 12.224 | 7.782  | 5.484  | 3.463 | 0.265  | 3.577  |
| cpd9       | 1.516      | 15.548 | 15.194 | 10.906  | 3.579 | 20.622 | 13.805 | 11.362 | 7.880 | 1.597  | 4.173  |
| cpd10      | 1.607      | 12.277 | 11.609 | 8.259   | 2.694 | 15.859 | 10.178 | 8.199  | 5.578 | 0.991  | 3.642  |
| cpd11      | 1.59       | 12.277 | 11.609 | 8.266   | 2.694 | 16.326 | 10.257 | 8.255  | 5.639 | 1.018  | 3.427  |
| cpd12      | 1.412      | 15.602 | 14.895 | 11.177  | 3.413 | 20.431 | 12.506 | 10.139 | 7.055 | 1.333  | 3.957  |
| cpd13      | 1.685      | 12.777 | 11.940 | 8.620   | 2.681 | 16.467 | 10.526 | 8.415  | 5.685 | 0.999  | 3.588  |
| cpd14      | 1.571      | 11.798 | 11.177 | 8.067   | 2.693 | 15.734 | 9.928  | 8.066  | 5.572 | 1.016  | 3.703  |
| cpd15      | 1.428      | 13.794 | 13.010 | 9.967   | 3.152 | 18.461 | 12.104 | 9.726  | 7.242 | 1.313  | 4.116  |
| cpd16      | 1.838      | 10.687 | 10.407 | 6.424   | 2.768 | 15.456 | 9.828  | 8.433  | 5.124 | 1.307  | 3.469  |
| cpd17      | 1.86       | 9.794  | 9.475  | 5.559   | 2.507 | 12.911 | 8.125  | 6.427  | 3.978 | 0.747  | 3.404  |
| cpd18      | 1.494      | 10.524 | 8.931  | 6.076   | 1.303 | 15.385 | 9.847  | 7.804  | 4.689 | 0.885  | 3.482  |
| cpd19      | 1.646      | 15.456 | 13.280 | 11.172  | 1.852 | 20.360 | 12.552 | 9.390  | 6.690 | 0.838  | 4.093  |
| cpd20      | 1.471      | 12.113 | 10.111 | 8.053   | 1.217 | 16.255 | 10.260 | 7.565  | 5.249 | 0.575  | 3.513  |
| cpd21      | 1.483      | 13.647 | 11.388 | 10.023  | 1.591 | 18.389 | 12.150 | 8.977  | 6.922 | 0.818  | 3.964  |
| cpd22      | 1.391      | 12.281 | 11.659 | 8.042   | 2.789 | 16.350 | 10.291 | 8.379  | 5.651 | 1.076  | 3.796  |
| cpd23      | 1.712      | 12.897 | 11.680 | 8.216   | 2.336 | 15.966 | 10.154 | 7.397  | 4.844 | 0.534  | 3.708  |
| cpd24      | 1.66       | 15.401 | 13.579 | 10.901  | 2.018 | 20.550 | 13.851 | 10.613 | 7.515 | 1.102  | 4.164  |
| cpd25      | 1.757      | 12.613 | 10.465 | 8.272   | 1.217 | 16.395 | 10.545 | 7.785  | 5.250 | 0.577  | 3.671  |
| cpd26      | 1.436      | 9.630  | 7.978  | 5.346   | 1.030 | 12.839 | 8.128  | 5.737  | 3.584 | 0.303  | 3.484  |
| cpd27      | 1.866      | 12.760 | 12.091 | 8.234   | 2.790 | 16.474 | 10.540 | 8.512  | 5.658 | 1.051  | 3.856  |
| cpd28      | 1.686      | 11.171 | 10.889 | 6.399   | 2.864 | 16.071 | 10.190 | 8.746  | 5.204 | 1.367  | 3.491  |
| cpd29      | 1.563      | 16.102 | 15.237 | 11.496  | 3.413 | 21.046 | 12.895 | 10.333 | 7.205 | 1.319  | 3.951  |
| cpd30      | 1.367      | 12.760 | 12.069 | 8.376   | 2.777 | 16.942 | 10.603 | 8.508  | 5.764 | 1.056  | 3.352  |
| cpd31      | 1.617      | 14.294 | 13.345 | 10.347  | 3.152 | 19.076 | 12.493 | 9.920  | 7.437 | 1.300  | 3.961  |



|            |            |        |        |        |         |           |         |         |          |           |         |
|------------|------------|--------|--------|--------|---------|-----------|---------|---------|----------|-----------|---------|
| cpd32      | 1.568      | 11.635 | 9.702  | 7.719  | 1.229   | 15.663    | 9.947   | 7.437   | 5.136    | 0.594     | 3.804   |
| cpd33      | 1.836      | 13.544 | 13.637 | 8.539  | 3.897   | 16.653    | 10.497  | 8.339   | 5.359    | 1.016     | 3.814   |
| cpd34      | 1.652      | 16.048 | 15.536 | 11.224 | 3.579   | 21.237    | 14.194  | 11.556  | 8.030    | 1.584     | 4.065   |
| cpd35      | 1.822      | 13.260 | 12.422 | 8.595  | 2.777   | 17.082    | 10.889  | 8.727   | 5.765    | 1.059     | 3.682   |
| cpd36      | 1.511      | 9.794  | 9.475  | 5.559  | 2.507   | 12.819    | 8.014   | 6.307   | 3.869    | 0.738     | 3.404   |
| Structures | Log[%DPPH] | X41    | X42    | X43    | X44     | X45       | X46     | X47     | X48      | X49       | X50     |
| cpd1       | 1.326      | 0.782  | 0.670  | 0.865  | 584.267 | 10649.140 | 346.895 | 398.930 | 3756.648 | 9227.623  | 92.683  |
| cpd2       | 1.423      | 0.709  | 0.980  | 0.786  | 384.000 | 5607.993  | 245.213 | 282.193 | 2105.241 | 5102.615  | 69.429  |
| cpd3       | 1.695      | 0.75   | 0.847  | 0.829  | 584.267 | 10662.090 | 346.895 | 398.930 | 3664.226 | 9241.886  | 91.921  |
| cpd4       | 1.483      | 0.691  | 1.070  | 0.77   | 398.930 | 6128.751  | 258.347 | 296.423 | 2365.620 | 5600.784  | 70.256  |
| cpd5       | 1.354      | 0.726  | 0.815  | 0.82   | 369.160 | 5079.442  | 232.192 | 268.078 | 1981.367 | 4603.396  | 67.832  |
| cpd6       | 1.389      | 0.779  | 0.695  | 0.854  | 505.754 | 7904.048  | 292.060 | 339.763 | 2679.179 | 6708.208  | 83.388  |
| cpd7       | 1.784      | 0.728  | 0.929  | 0.788  | 296.423 | 3714.704  | 200.089 | 226.477 | 1643.631 | 3719.108  | 65.607  |
| cpd8       | 1.717      | 0.761  | 0.671  | 0.842  | 254.084 | 2946.454  | 175.251 | 199.421 | 1256.661 | 2949.105  | 58.301  |
| cpd9       | 1.516      | 0.762  | 0.871  | 0.827  | 664.386 | 12177.950 | 374.836 | 429.050 | 4357.715 | 10648.070 | 101.131 |
| cpd10      | 1.607      | 0.716  | 1.058  | 0.775  | 459.500 | 6672.883  | 271.591 | 310.764 | 2622.488 | 6123.250  | 77.712  |
| cpd11      | 1.59       | 0.674  | 1.274  | 0.729  | 459.500 | 6696.578  | 271.591 | 310.764 | 2539.603 | 6141.171  | 81.362  |
| cpd12      | 1.412      | 0.723  | 1.087  | 0.784  | 664.386 | 12189.470 | 374.836 | 429.050 | 4264.178 | 10661.720 | 104.316 |
| cpd13      | 1.685      | 0.694  | 1.167  | 0.755  | 474.842 | 7270.108  | 284.941 | 325.212 | 2832.483 | 6691.799  | 81.434  |
| cpd14      | 1.571      | 0.725  | 0.940  | 0.797  | 444.235 | 6113.738  | 258.347 | 296.423 | 2405.279 | 5588.351  | 78.881  |
| cpd15      | 1.428      | 0.787  | 0.742  | 0.847  | 584.267 | 9205.253  | 319.295 | 369.160 | 3183.394 | 7905.635  | 95.836  |
| cpd16      | 1.838      | 0.729  | 1.055  | 0.767  | 369.160 | 4593.310  | 225.475 | 254.084 | 2018.654 | 4600.345  | 76.785  |
| cpd17      | 1.86       | 0.724  | 0.988  | 0.775  | 325.212 | 3723.531  | 200.089 | 226.477 | 1578.950 | 3728.937  | 68.606  |
| cpd18      | 1.494      | 0.724  | 0.978  | 0.781  | 310.764 | 4140.313  | 212.717 | 240.215 | 1849.930 | 4145.089  | 67.911  |
| cpd19      | 1.646      | 0.743  | 0.907  | 0.819  | 600.168 | 11406.970 | 360.824 | 413.947 | 3996.073 | 9933.385  | 93.894  |
| cpd20      | 1.471      | 0.685  | 1.131  | 0.757  | 398.930 | 6136.723  | 258.347 | 296.423 | 2348.511 | 5605.793  | 72.520  |
| cpd21      | 1.483      | 0.755  | 0.843  | 0.825  | 521.319 | 8536.118  | 305.631 | 354.413 | 2961.854 | 7288.980  | 85.744  |
| cpd22      | 1.391      | 0.737  | 0.904  | 0.808  | 459.500 | 6668.595  | 271.591 | 310.764 | 2662.265 | 6117.673  | 78.607  |
| cpd23      | 1.712      | 0.712  | 1.047  | 0.78   | 459.500 | 7285.636  | 284.941 | 325.212 | 2804.777 | 6701.124  | 81.263  |
| cpd24      | 1.66       | 0.756  | 0.836  | 0.833  | 600.168 | 11395.770 | 360.824 | 413.947 | 4087.330 | 9920.247  | 94.321  |
| cpd25      | 1.757      | 0.705  | 1.029  | 0.781  | 413.947 | 6683.754  | 271.591 | 310.764 | 2621.623 | 6130.111  | 71.833  |
| cpd26      | 1.436      | 0.733  | 0.838  | 0.806  | 268.078 | 3321.415  | 187.598 | 212.877 | 1437.734 | 3324.459  | 59.619  |
| cpd27      | 1.866      | 0.749  | 0.899  | 0.811  | 474.842 | 7254.644  | 284.941 | 325.212 | 2893.024 | 6679.048  | 78.189  |
| cpd28      | 1.686      | 0.726  | 1.094  | 0.761  | 384.000 | 5070.381  | 238.359 | 268.078 | 2250.269 | 5077.750  | 77.211  |
| cpd29      | 1.563      | 0.717  | 1.136  | 0.777  | 680.587 | 12989.460 | 388.930 | 444.235 | 4625.621 | 11407.950 | 105.639 |
| cpd30      | 1.367      | 0.654  | 1.403  | 0.705  | 474.842 | 7278.164  | 284.941 | 325.212 | 2808.807 | 6696.876  | 83.820  |
| cpd31      | 1.617      | 0.755  | 0.945  | 0.807  | 600.168 | 9892.040  | 333.051 | 384.000 | 3493.113 | 8540.287  | 97.540  |
| cpd32      | 1.568      | 0.739  | 0.781  | 0.83   | 384.000 | 5581.379  | 245.213 | 282.193 | 2212.411 | 5080.331  | 69.429  |
| cpd33      | 1.836      | 0.729  | 1.044  | 0.785  | 536.955 | 8535.760  | 311.942 | 354.413 | 3310.826 | 7900.073  | 86.377  |
| cpd34      | 1.652      | 0.738  | 1.022  | 0.799  | 680.587 | 12979.790 | 388.930 | 444.235 | 4718.696 | 11395.550 | 100.873 |
| cpd35      | 1.822      | 0.707  | 1.125  | 0.766  | 490.261 | 7878.684  | 298.392 | 339.763 | 3115.200 | 7274.270  | 81.134  |
| cpd36      | 1.511      | 0.724  | 0.988  | 0.775  | 325.212 | 3723.531  | 200.089 | 226.477 | 1578.950 | 3728.937  | 64.007  |
| Structures | Log[%DPPH] | X51    | X52    | X53    | X54     | X55       | X56     | X57     | X58      | X59       | X60     |
| cpd1       | 1.326      | 11.432 | 3.701  | 24.160 | 2.911   | 3.656     | 2.448   | 0       | 2        | 506.222   | 429.795 |
| cpd2       | 1.423      | 13.603 | 4.814  | 12.429 | -0.090  | 4.138     | 2.304   | 0       | 2        | 385.432   | 340.082 |
| cpd3       | 1.695      | 12.744 | 2.827  | 26.024 | 1.117   | 3.659     | 2.846   | 1       | 2        | 470.705   | 395.612 |
| cpd4       | 1.483      | 16.349 | 2.039  | 24.810 | -0.109  | 1.834     | 2.243   | 0       | 1        | 417.420   | 350.667 |
| cpd5       | 1.354      | 0.000  | 0.000  | 12.346 | 0.241   | 3.991     | 2.575   | 1       | 2        | 408.288   | 330.038 |
| cpd6       | 1.389      | 2.228  | 2.778  | 12.638 | 1.579   | 4.366     | 6.891   | 0       | 2        | 457.221   | 385.965 |
| cpd7       | 1.784      | 8.352  | 2.376  | 12.068 | 0.066   | 6.348     | 3.529   | 0       | 3        | 397.376   | 321.805 |
| cpd8       | 1.717      | 6.590  | 0.595  | 22.855 | -0.738  | 1.290     | 2.098   | 0       | 1        | 318.122   | 265.551 |
| cpd9       | 1.516      | 11.061 | 3.388  | 24.122 | 2.376   | 3.534     | 0.595   | 0       | 2        | 532.715   | 444.290 |
| cpd10      | 1.607      | 13.750 | 1.317  | 12.119 | -0.323  | 1.645     | 0.496   | 0       | 1        | 422.925   | 350.707 |
| cpd11      | 1.59       | 12.992 | 4.284  | 12.399 | -0.294  | 4.018     | 0.617   | 0       | 2        | 399.661   | 334.434 |
| cpd12      | 1.412      | 12.309 | 2.545  | 25.981 | 0.727   | 3.517     | 0.993   | 1       | 2        | 503.434   | 435.820 |
| cpd13      | 1.685      | 15.728 | 1.748  | 24.767 | -0.391  | 1.709     | 0.556   | 0       | 1        | 434.901   | 364.526 |
| cpd14      | 1.571      | 0.000  | 0.000  | 12.317 | 0.037   | 3.823     | 0.888   | 1       | 2        | 417.918   | 343.730 |
| cpd15      | 1.428      | 2.238  | 2.922  | 12.674 | -0.016  | 4.381     | 5.525   | 0       | 2        | 479.898   | 399.105 |
| cpd16      | 1.838      | 7.972  | 2.167  | 12.038 | -0.138  | 6.126     | 1.772   | 0       | 3        | 413.713   | 334.453 |
| cpd17      | 1.86       | 6.173  | 0.302  | 22.810 | -1.033  | 1.216     | 0.411   | 0       | 1        | 335.168   | 280.118 |
| cpd18      | 1.494      | 8.540  | 2.519  | 11.790 | -0.150  | 6.478     | 3.567   | 0       | 3        | 403.174   | 332.227 |
| cpd19      | 1.646      | 12.846 | 2.901  | 25.655 | 0.946   | 3.703     | 3.152   | 1       | 2        | 524.756   | 439.463 |
| cpd20      | 1.471      | 13.919 | 5.287  | 12.061 | -0.236  | 4.161     | 2.190   | 0       | 2        | 415.979   | 355.273 |
| cpd21      | 1.483      | 2.237  | 2.813  | 12.247 | 1.421   | 4.407     | 7.329   | 0       | 2        | 464.436   | 397.338 |
| cpd22      | 1.391      | 0.000  | 0.000  | 11.961 | -0.258  | 3.970     | 0.878   | 1       | 2        | 402.889   | 333.869 |
| cpd23      | 1.712      | 11.762 | 0.704  | 11.977 | -0.419  | 0.000     | 1.630   | 0       | 0        | 433.634   | 357.111 |
| cpd24      | 1.66       | 11.520 | 3.815  | 23.831 | 2.939   | 3.693     | 2.653   | 0       | 2        | 537.541   | 446.081 |
| cpd25      | 1.757      | 16.561 | 2.208  | 24.509 | -0.275  | 1.951     | 2.165   | 0       | 1        | 442.136   | 365.749 |
| cpd26      | 1.436      | 6.861  | 0.999  | 22.621 | -0.793  | 1.312     | 1.858   | 0       | 1        | 334.442   | 279.721 |
| cpd27      | 1.866      | 13.284 | 2.717  | 11.861 | -0.445  | 1.849     | 0.343   | 0       | 1        | 428.334   | 363.338 |
| cpd28      | 1.686      | 8.218  | 2.343  | 11.760 | -0.353  | 6.288     | 1.654   | 0       | 3        | 406.382   | 345.295 |
| cpd29      | 1.563      | 12.466 | 2.656  | 25.614 | 0.584   | 3.580     | 1.165   | 1       | 2        | 539.309   | 452.958 |
| cpd30      | 1.367      | 13.398 | 4.843  | 12.031 | -0.440  | 4.056     | 0.337   | 0       | 2        | 443.766   | 370.436 |

|            |            |        |           |          |           |           |        |          |         |         |         |
|------------|------------|--------|-----------|----------|-----------|-----------|--------|----------|---------|---------|---------|
| cpd31      | 1.617      | 2.188  | 2.687     | 12.217   | 1.126     | 4.289     | 5.046  | 0        | 2       | 472.823 | 409.967 |
| cpd32      | 1.568      | 0.000  | 0.000     | 11.991   | -0.054    | 4.112     | 2.731  | 1        | 2       | 410.566 | 342.974 |
| cpd33      | 1.836      | 8.445  | 0.327     | 11.947   | -0.622    | 0.000     | -0.223 | 0        | 0       | 432.463 | 367.381 |
| cpd34      | 1.652      | 11.196 | 3.546     | 23.794   | 2.457     | 3.587     | 0.666  | 0        | 2       | 553.192 | 459.561 |
| cpd35      | 1.822      | 16.025 | 1.963     | 24.467   | -0.546    | 1.847     | 0.312  | 0        | 1       | 449.832 | 377.397 |
| cpd36      | 1.511      | 6.002  | 0.128     | 22.679   | -1.311    | 1.196     | -0.012 | 0        | 1       | 314.988 | 258.615 |
| Structures | Log[%DPPH] | X61    | X62       | X63      | X64       | X65       | X66    | X67      | X68     | X69     | X70     |
| cpd1       | 1.326      | 1.167  | 11864.330 | 2623.574 | 8019.369  | 8340.794  | 4.702  | 971.632  | 119.609 | 61.514  | 87.963  |
| cpd2       | 1.423      | 1.136  | 6584.136  | 1414.636 | 4288.189  | 4791.773  | 3.868  | 608.958  | 91.313  | 53.251  | 72.717  |
| cpd3       | 1.695      | 1.271  | 10985.720 | 2653.909 | 6976.834  | 8060.188  | 4.155  | 946.699  | 100.150 | 64.305  | 83.126  |
| cpd4       | 1.483      | 1.139  | 5548.074  | 2522.332 | 3316.408  | 3663.387  | 3.802  | 782.261  | 80.355  | 68.654  | 82.472  |
| cpd5       | 1.354      | 1.137  | 12410.040 | 922.197  | 8584.177  | 8914.627  | 4.885  | 823.419  | 89.227  | 46.672  | 95.852  |
| cpd6       | 1.389      | 1.12   | 9959.808  | 1467.620 | 6552.719  | 7355.660  | 4.678  | 1003.269 | 113.445 | 49.596  | 78.621  |
| cpd7       | 1.784      | 1.092  | 6313.597  | 1371.603 | 4029.930  | 4662.604  | 4.297  | 773.137  | 90.186  | 52.938  | 74.147  |
| cpd8       | 1.717      | 1.225  | 3419.963  | 1202.575 | 2090.695  | 2424.655  | 3.466  | 496.979  | 73.597  | 46.692  | 56.905  |
| cpd9       | 1.516      | 1.225  | 12510.030 | 2881.180 | 8582.902  | 8633.269  | 4.698  | 1035.538 | 109.180 | 66.410  | 102.347 |
| cpd10      | 1.607      | 1.233  | 7380.892  | 2477.761 | 4038.215  | 5659.602  | 4.228  | 830.199  | 98.386  | 55.094  | 78.896  |
| cpd11      | 1.59       | 1.284  | 5525.331  | 1908.674 | 3131.014  | 4133.158  | 3.765  | 609.550  | 87.672  | 56.331  | 63.128  |
| cpd12      | 1.412      | 1.252  | 11191.030 | 3756.080 | 6529.751  | 8276.075  | 4.174  | 963.616  | 113.079 | 70.894  | 81.602  |
| cpd13      | 1.685      | 1.213  | 8029.836  | 2252.566 | 4770.892  | 6053.330  | 3.977  | 708.398  | 105.107 | 57.364  | 69.322  |
| cpd14      | 1.571      | 1.217  | 11255.560 | 1369.571 | 7645.964  | 8145.623  | 4.826  | 908.209  | 101.609 | 48.917  | 79.950  |
| cpd15      | 1.428      | 1.191  | 11745.130 | 1574.586 | 8129.116  | 8329.833  | 4.671  | 1019.123 | 103.507 | 57.030  | 98.118  |
| cpd16      | 1.838      | 1.179  | 5720.396  | 1828.363 | 3285.740  | 4310.909  | 3.805  | 705.668  | 88.551  | 54.562  | 64.663  |
| cpd17      | 1.86       | 1.314  | 5853.116  | 1031.285 | 3920.729  | 4221.765  | 3.638  | 613.022  | 78.912  | 45.060  | 68.009  |
| cpd18      | 1.494      | 1.103  | 5541.202  | 1555.261 | 3363.830  | 4119.555  | 4.038  | 680.653  | 88.596  | 52.912  | 73.947  |
| cpd19      | 1.646      | 1.178  | 17476.590 | 3215.494 | 11081.570 | 13125.960 | 5.199  | 2807.720 | 135.354 | 59.743  | 90.776  |
| cpd20      | 1.471      | 1.13   | 6737.456  | 2482.118 | 3345.010  | 5295.593  | 4.21   | 916.266  | 110.626 | 59.810  | 62.192  |
| cpd21      | 1.483      | 1.126  | 10153.270 | 1663.524 | 6770.813  | 7380.899  | 4.452  | 1248.566 | 110.263 | 56.878  | 81.837  |
| cpd22      | 1.391      | 1.298  | 11429.030 | 1434.879 | 7652.056  | 8367.192  | 4.884  | 791.296  | 99.503  | 44.942  | 83.544  |
| cpd23      | 1.712      | 1.236  | 8329.155  | 2299.787 | 5255.871  | 6038.346  | 4.148  | 927.130  | 95.966  | 68.150  | 82.650  |
| cpd24      | 1.66       | 1.158  | 19881.480 | 2908.273 | 12925.210 | 14824.110 | 5.63   | 1708.515 | 137.341 | 55.883  | 95.026  |
| cpd25      | 1.757      | 1.133  | 19515.200 | 1668.103 | 13377.720 | 14110.180 | 5.628  | 1346.570 | 97.923  | 57.637  | 106.846 |
| cpd26      | 1.436      | 1.216  | 3916.443  | 1333.591 | 2337.156  | 2845.657  | 3.325  | 523.189  | 74.044  | 52.166  | 57.555  |
| cpd27      | 1.866      | 1.231  | 13256.520 | 1215.370 | 9302.767  | 9365.721  | 4.867  | 899.365  | 96.625  | 49.563  | 98.523  |
| cpd28      | 1.686      | 1.186  | 5883.331  | 1913.975 | 3419.154  | 4388.584  | 4.006  | 761.386  | 92.035  | 55.039  | 71.202  |
| cpd29      | 1.563      | 1.238  | 19215.940 | 3716.878 | 12023.050 | 14521.820 | 5.245  | 2826.958 | 142.933 | 61.584  | 87.259  |
| cpd30      | 1.367      | 1.2    | 10734.920 | 2099.773 | 6717.094  | 8106.173  | 4.855  | 1108.855 | 116.402 | 50.715  | 74.562  |
| cpd31      | 1.617      | 1.196  | 11048.750 | 2439.888 | 7133.113  | 8077.162  | 4.457  | 1088.324 | 109.086 | 64.319  | 88.223  |
| cpd32      | 1.568      | 1.138  | 5943.022  | 1688.646 | 3684.042  | 4346.932  | 4.271  | 841.593  | 85.669  | 59.884  | 80.723  |
| cpd33      | 1.836      | 1.318  | 7879.308  | 2404.312 | 4717.520  | 5835.048  | 3.981  | 881.702  | 92.269  | 59.469  | 85.489  |
| cpd34      | 1.652      | 1.217  | 21904.810 | 3382.877 | 14105.320 | 16413.920 | 5.658  | 1821.253 | 142.441 | 58.164  | 94.202  |
| cpd35      | 1.822      | 1.212  | 15328.240 | 2758.649 | 9648.779  | 11586.450 | 0.638  | 1666.132 | 115.965 | 59.643  | 83.080  |
| cpd36      | 1.511      | 1.428  | 4524.673  | 1172.599 | 2817.097  | 3340.904  | 0.615  | 636.116  | 75.467  | 46.582  | 53.980  |
| Structures | Log[%DPPH] | X71    | X72       | X73      | X74       | X75       | X76    | X77      | X78     | X79     | X80     |
| cpd1       | 1.326      | 0.648  | 0.605     | 0.574    | 16.677    | 11.061    | 9.189  | 1.815    | 3.127   | 1.815   | -1.321  |
| cpd2       | 1.423      | 0.673  | 0.666     | 0.638    | 13.903    | 9.765     | 8.194  | 1.697    | 0.778   | -0.674  | -0.273  |
| cpd3       | 1.695      | 0.560  | 0.665     | 0.656    | 15.318    | 11.684    | 8.270  | 1.852    | 8.009   | -5.88   | 2.896   |
| cpd4       | 1.483      | 0.537  | 0.617     | 0.672    | 12.843    | 11.654    | 9.550  | 1.345    | 4.866   | -2.321  | 1.783   |
| cpd5       | 1.354      | 0.502  | 0.636     | 0.593    | 19.768    | 8.985     | 8.170  | 2.420    | 8.856   | 7.148   | -1.298  |
| cpd6       | 1.389      | 0.734  | 0.630     | 0.570    | 16.462    | 9.393     | 8.379  | 1.965    | 2.591   | 0.862   | -1.672  |
| cpd7       | 1.784      | 0.592  | 0.584     | 0.592    | 14.510    | 10.492    | 8.639  | 1.680    | 4.344   | 2.918   | -3.153  |
| cpd8       | 1.717      | 0.676  | 0.655     | 0.620    | 11.840    | 9.202     | 7.751  | 1.528    | 7.294   | -5.872  | -0.84   |
| cpd9       | 1.516      | 0.612  | 0.644     | 0.669    | 16.276    | 10.965    | 9.397  | 1.732    | 4.214   | 1.209   | 1.243   |
| cpd10      | 1.607      | 0.576  | 0.692     | 0.730    | 15.224    | 11.225    | 7.098  | 2.145    | 3.826   | 2.259   | -0.947  |
| cpd11      | 1.59       | 0.695  | 0.680     | 0.610    | 12.548    | 10.048    | 8.247  | 1.522    | 4.284   | 2.254   | 2.941   |
| cpd12      | 1.412      | 0.671  | 0.588     | 0.572    | 14.120    | 11.941    | 10.104 | 1.397    | 9.082   | 7.404   | -5.176  |
| cpd13      | 1.685      | 0.717  | 0.686     | 0.661    | 13.558    | 10.814    | 7.735  | 1.753    | 10.086  | -0.102  | -4.847  |
| cpd14      | 1.571      | 0.686  | 0.641     | 0.504    | 17.554    | 8.444     | 9.037  | 2.079    | 2.131   | 0.369   | 2.098   |
| cpd15      | 1.428      | 0.564  | 0.593     | 0.637    | 17.139    | 10.705    | 8.984  | 1.908    | 2.564   | 0.288   | 1.501   |
| cpd16      | 1.838      | 0.665  | 0.723     | 0.684    | 12.913    | 10.315    | 7.316  | 1.765    | 5.914   | 2.299   | -0.993  |
| cpd17      | 1.86       | 0.609  | 0.618     | 0.576    | 14.493    | 8.943     | 8.147  | 1.779    | 9.139   | -8.591  | -1.092  |
| cpd18      | 1.494      | 0.609  | 0.659     | 0.646    | 14.409    | 10.102    | 7.950  | 1.812    | 8.121   | 5.613   | 3.59    |
| cpd19      | 1.646      | 0.545  | 0.538     | 0.549    | 19.239    | 12.910    | 8.594  | 2.239    | 5.508   | -3.343  | 2.4     |
| cpd20      | 1.471      | 0.660  | 0.667     | 0.650    | 13.382    | 12.533    | 7.153  | 1.871    | 2.409   | 0.484   | 1.948   |
| cpd21      | 1.483      | 0.749  | 0.760     | 0.631    | 15.963    | 9.216     | 8.123  | 1.965    | 4.062   | -2.107  | 1.738   |
| cpd22      | 1.391      | 0.610  | 0.699     | 0.673    | 17.747    | 9.185     | 6.996  | 2.537    | 1.652   | -0.467  | 1.161   |
| cpd23      | 1.712      | 0.559  | 0.664     | 0.659    | 14.482    | 11.846    | 8.659  | 1.673    | 6.038   | -2.321  | 5.554   |
| cpd24      | 1.66       | 0.549  | 0.617     | 0.633    | 20.356    | 12.282    | 7.371  | 2.762    | 8.754   | 2.767   | -5.741  |
| cpd25      | 1.757      | 0.431  | 0.593     | 0.586    | 20.663    | 11.005    | 8.829  | 2.341    | 5.62    | -0.112  | -3.292  |
| cpd26      | 1.436      | 0.618  | 0.586     | 0.600    | 11.366    | 10.547    | 8.437  | 1.347    | 8.847   | -2.657  | 7.587   |
| cpd27      | 1.866      | 0.596  | 0.658     | 0.604    | 18.731    | 8.655     | 8.702  | 2.164    | 3.103   | -0.237  | 0.589   |
| cpd28      | 1.686      | 0.633  | 0.690     | 0.684    | 13.772    | 10.561    | 7.556  | 1.823    | 7.263   | 4.505   | -3.457  |
| cpd29      | 1.563      | 0.568  | 0.637     | 0.621    | 19.110    | 13.160    | 7.349  | 2.600    | 3.533   | -2.802  | 1.541   |

|            |            |        |        |        |        |           |        |          |       |        |        |
|------------|------------|--------|--------|--------|--------|-----------|--------|----------|-------|--------|--------|
| cpd30      | 1.367      | 0.585  | 0.611  | 0.643  | 16.669 | 11.930    | 6.958  | 2.396    | 1.598 | -0.869 | 0.485  |
| cpd31      | 1.617      | 0.620  | 0.591  | 0.553  | 16.068 | 10.958    | 9.927  | 1.619    | 5.104 | 3.827  | -3.357 |
| cpd32      | 1.568      | 0.528  | 0.640  | 0.625  | 14.967 | 10.841    | 8.636  | 1.733    | 2.884 | -2.318 | -1.31  |
| cpd33      | 1.836      | 0.550  | 0.614  | 0.653  | 15.057 | 11.141    | 8.693  | 1.732    | 3.173 | 1.782  | 2.605  |
| cpd34      | 1.652      | 0.560  | 0.612  | 0.611  | 20.306 | 12.528    | 7.587  | 2.677    | 7.104 | 2.189  | -5.754 |
| cpd35      | 1.822      | 0.552  | 0.689  | 0.638  | 17.776 | 11.809    | 7.329  | 2.426    | 43    | 741.5  | -36544 |
| cpd36      | 1.511      | 0.642  | 0.644  | 0.615  | 11.946 | 9.845     | 7.343  | 1.627    | 26.8  | 20.4   | -28715 |
| Structures | Log[%DPPH] | X81    | X82    | X83    | X84    | X85       | X86    | X87      |       |        |        |
| cpd1       | 1.326      | 2.176  | -7.783 | -2.051 | 55.149 | -5244.673 | -42446 | 517.097  |       |        |        |
| cpd2       | 1.423      | 0.277  | -7.806 | -1.341 | 43.009 | -3788.676 | -29514 | 481.533  |       |        |        |
| cpd3       | 1.695      | -4.603 | -7.760 | -0.974 | 47.676 | -5345.689 | -45436 | 28.808   |       |        |        |
| cpd4       | 1.483      | -3.888 | -7.696 | -1.304 | 43.570 | -4014.457 | -30835 | 485.316  |       |        |        |
| cpd5       | 1.354      | -5.065 | -7.413 | -1.085 | 39.915 | -3762.835 | -25295 | 373.922  |       |        |        |
| cpd6       | 1.389      | -1.782 | -7.554 | -1.089 | 46.999 | -4451.515 | -36646 | 348.497  |       |        |        |
| cpd7       | 1.784      | 0.64   | -7.642 | -1.118 | 37.597 | -3374.134 | -24337 | 291.254  |       |        |        |
| cpd8       | 1.717      | 4.244  | -7.641 | -1.405 | 31.131 | -3359.906 | -21355 | 340.366  |       |        |        |
| cpd9       | 1.516      | 3.841  | -8.038 | -2.029 | 53.140 | -6498.793 | -51557 | 238.093  |       |        |        |
| cpd10      | 1.607      | 2.994  | -8.103 | -1.511 | 39.583 | -5294.503 | -36350 | 128.354  |       |        |        |
| cpd11      | 1.59       | 2.151  | -7.882 | -1.038 | 37.371 | -5057.077 | -38336 | -126.794 |       |        |        |
| cpd12      | 1.412      | -0.935 | -8.218 | -1.755 | 52.057 | -6577.751 | -53290 | 258.476  |       |        |        |
| cpd13      | 1.685      | -8.844 | -8.206 | -1.601 | 41.780 | -5268.333 | -37960 | 211.016  |       |        |        |
| cpd14      | 1.571      | 0.289  | -8.015 | -1.544 | 38.692 | -5017.131 | -32750 | 90.852   |       |        |        |
| cpd15      | 1.428      | -2.059 | -7.445 | -1.595 | 45.514 | -5705.500 | -44065 | 72.597   |       |        |        |
| cpd16      | 1.838      | 5.357  | -8.219 | -1.649 | 36.182 | -4628.095 | -32379 | 15.918   |       |        |        |
| cpd17      | 1.86       | 2.919  | -7.810 | -1.588 | 29.832 | -4613.884 | -27263 | 64.649   |       |        |        |
| cpd18      | 1.494      | -4.643 | -8.121 | -1.617 | 38.595 | -3628.355 | -27236 | 269.030  |       |        |        |
| cpd19      | 1.646      | -3.661 | -7.915 | -1.533 | 53.963 | -5579.850 | -43473 | 469.169  |       |        |        |
| cpd20      | 1.471      | -1.33  | -7.598 | -1.462 | 44.009 | -4044.157 | -30978 | 430.234  |       |        |        |
| cpd21      | 1.483      | -3.007 | -7.607 | -1.275 | 47.868 | -4706.382 | -40217 | 311.360  |       |        |        |
| cpd22      | 1.391      | -1.078 | -8.138 | -1.2   | 37.119 | -5284.645 | -36009 | -237.929 |       |        |        |
| cpd23      | 1.712      | 0.466  | -7.769 | -1.215 | 41.038 | -5302.387 | -36123 | 305.575  |       |        |        |
| cpd24      | 1.66       | -6.001 | -8.034 | -1.954 | 55.885 | -5499.938 | -42128 | 470.780  |       |        |        |
| cpd25      | 1.757      | 4.553  | -7.827 | -1.353 | 43.918 | -4270.187 | -28948 | 428.282  |       |        |        |
| cpd26      | 1.436      | -3.694 | -8.059 | -1.552 | 31.745 | -3615.046 | -23883 | 296.929  |       |        |        |
| cpd27      | 1.866      | -3.037 | -7.983 | -1.666 | 40.758 | -5549.669 | -36992 | 84.315   |       |        |        |
| cpd28      | 1.686      | 4.528  | -8.546 | -1.941 | 37.489 | -4882.571 | -35326 | -12.196  |       |        |        |
| cpd29      | 1.563      | -1.504 | -8.224 | -1.656 | 53.022 | -6833.782 | -51758 | 194.504  |       |        |        |
| cpd30      | 1.367      | -1.251 | -7.733 | -1.663 | 42.315 | -5298.437 | -36928 | 147.556  |       |        |        |
| cpd31      | 1.617      | -0.373 | -7.761 | -1.24  | 46.823 | -5960.788 | -47895 | 25.754   |       |        |        |
| cpd32      | 1.568      | -1.109 | -7.382 | -0.937 | 41.358 | -4017.952 | -29556 | 331.023  |       |        |        |
| cpd33      | 1.836      | -0.328 | -7.971 | -1.559 | 39.992 | -6555.914 | -46349 | 40.236   |       |        |        |
| cpd34      | 1.652      | -3.546 | -8.040 | -1.954 | 54.637 | -6754.220 | -50285 | 188.032  |       |        |        |
| cpd35      | 1.822      | 6.807  | -8.121 | -1.501 | 43.009 | -5524.276 | -36544 | 149.993  |       |        |        |
| cpd36      | 1.511      | 1.356  | -8.203 | -1.269 | 26.825 | -4726.323 | -28715 | -274.813 |       |        |        |

**Table S4.** Hyperparameters to be tested for (a) RF and (b) ANN.

| <b>(a) Random forest</b> |                     | <b>(b) Artificial neural networks</b> |                        |
|--------------------------|---------------------|---------------------------------------|------------------------|
| <b>Hyperparameter</b>    | <b>Value tested</b> | <b>Hyperparameter</b>                 | <b>Value tested</b>    |
| n estimators             | 30, 50, 70, 90      | number of hidden layers               | 1,2,3                  |
| max depth                | 11, 12, 13, 14, 15  | number of neurons                     | 2, 3, 4, 5, 6, 7, 8, 9 |
| min samples split        | 1, 2, 3             | learning rate                         | 0.01, 0.05, 0.1        |
| min samples leaf         | 1, 2, 3             | batch size                            | 4, 8, 16, 32           |
|                          |                     | max_iter                              | 600, 900, 1200, 1500   |

**Table S5.** Experimental and predicted Log[%DPPH] values for the training set and test set of NSAID-Se Derivatives obtained from RF, ANN models.

| <b>(a) Training set</b> |                            |                         |                   | <b>(b) Training set</b> |                            |                         |                   |
|-------------------------|----------------------------|-------------------------|-------------------|-------------------------|----------------------------|-------------------------|-------------------|
| No.                     | Experimental<br>Log[%DPPH] | Predicted<br>Log[%DPPH] |                   | No.                     | Experimental<br>Log[%DPPH] | Predicted<br>Log[%DPPH] |                   |
|                         |                            | RF <sub>RM</sub>        | ANN <sub>RM</sub> |                         |                            | RF <sub>KS</sub>        | ANN <sub>KS</sub> |
| 1                       | 1.326                      | 1.434                   | 1.390             | 1                       | 1.326                      | 1.344                   | 1.329             |
| 2                       | 1.423                      | 1.462                   | 1.430             | 3                       | 1.695                      | 1.640                   | 1.748             |
| 3                       | 1.695                      | 1.616                   | 1.682             | 6                       | 1.389                      | 1.406                   | 1.390             |
| 4                       | 1.483                      | 1.518                   | 1.472             | 7                       | 1.784                      | 1.706                   | 1.779             |
| 5                       | 1.354                      | 1.437                   | 1.341             | 9                       | 1.516                      | 1.551                   | 1.521             |
| 6                       | 1.389                      | 1.419                   | 1.368             | 10                      | 1.607                      | 1.698                   | 1.648             |
| 9                       | 1.516                      | 1.561                   | 1.570             | 11                      | 1.590                      | 1.541                   | 1.590             |
| 10                      | 1.607                      | 1.661                   | 1.537             | 12                      | 1.412                      | 1.433                   | 1.372             |
| 13                      | 1.685                      | 1.638                   | 1.643             | 13                      | 1.685                      | 1.654                   | 1.718             |
| 14                      | 1.571                      | 1.526                   | 1.562             | 15                      | 1.428                      | 1.468                   | 1.412             |
| 15                      | 1.428                      | 1.456                   | 1.321             | 16                      | 1.838                      | 1.749                   | 1.823             |
| 16                      | 1.838                      | 1.729                   | 1.827             | 17                      | 1.860                      | 1.794                   | 1.748             |
| 17                      | 1.860                      | 1.724                   | 1.821             | 18                      | 1.494                      | 1.503                   | 1.490             |
| 18                      | 1.494                      | 1.527                   | 1.441             | 19                      | 1.646                      | 1.595                   | 1.748             |
| 19                      | 1.646                      | 1.595                   | 1.564             | 20                      | 1.471                      | 1.467                   | 1.463             |
| 20                      | 1.471                      | 1.450                   | 1.424             | 21                      | 1.483                      | 1.492                   | 1.481             |
| 21                      | 1.483                      | 1.498                   | 1.522             | 22                      | 1.391                      | 1.428                   | 1.383             |
| 22                      | 1.391                      | 1.471                   | 1.330             | 23                      | 1.712                      | 1.646                   | 1.701             |
| 24                      | 1.660                      | 1.628                   | 1.689             | 24                      | 1.660                      | 1.625                   | 1.650             |
| 25                      | 1.757                      | 1.726                   | 1.768             | 26                      | 1.436                      | 1.473                   | 1.428             |
| 28                      | 1.686                      | 1.730                   | 1.672             | 28                      | 1.686                      | 1.717                   | 1.699             |
| 29                      | 1.563                      | 1.661                   | 1.670             | 29                      | 1.563                      | 1.579                   | 1.552             |
| 30                      | 1.367                      | 1.500                   | 1.427             | 30                      | 1.367                      | 1.388                   | 1.383             |
| 31                      | 1.617                      | 1.656                   | 1.721             | 31                      | 1.617                      | 1.641                   | 1.601             |
| 32                      | 1.568                      | 1.511                   | 1.469             | 32                      | 1.568                      | 1.487                   | 1.582             |
| 33                      | 1.836                      | 1.747                   | 1.778             | 33                      | 1.836                      | 1.725                   | 1.748             |
| 34                      | 1.652                      | 1.620                   | 1.691             | 34                      | 1.652                      | 1.611                   | 1.651             |
| 35                      | 1.822                      | 1.740                   | 1.812             | 36                      | 1.511                      | 1.611                   | 1.520             |
| <b>Test set</b>         |                            |                         |                   | <b>Test set</b>         |                            |                         |                   |
| 7                       | 1.784                      | 1.693                   | 1.828             | 2                       | 1.423                      | 1.478                   | 1.508             |
| 8                       | 1.717                      | 1.711                   | 1.637             | 4                       | 1.483                      | 1.511                   | 1.424             |
| 11                      | 1.590                      | 1.564                   | 1.515             | 5                       | 1.354                      | 1.450                   | 1.377             |
| 12                      | 1.412                      | 1.522                   | 1.361             | 8                       | 1.717                      | 1.665                   | 1.748             |
| 23                      | 1.712                      | 1.661                   | 1.657             | 14                      | 1.571                      | 1.590                   | 1.473             |
| 26                      | 1.436                      | 1.576                   | 1.557             | 25                      | 1.757                      | 1.705                   | 1.748             |
| 27                      | 1.866                      | 1.742                   | 1.783             | 27                      | 1.866                      | 1.719                   | 1.748             |
| 36                      | 1.511                      | 1.589                   | 1.576             | 35                      | 1.822                      | 1.758                   | 1.868             |

**Figure S1.** Comparison of predicted Log[%DPPH] for new NSAIDs-Se derivatives based on RF<sub>KS</sub> and ANN<sub>KS</sub> models, and experimental results.

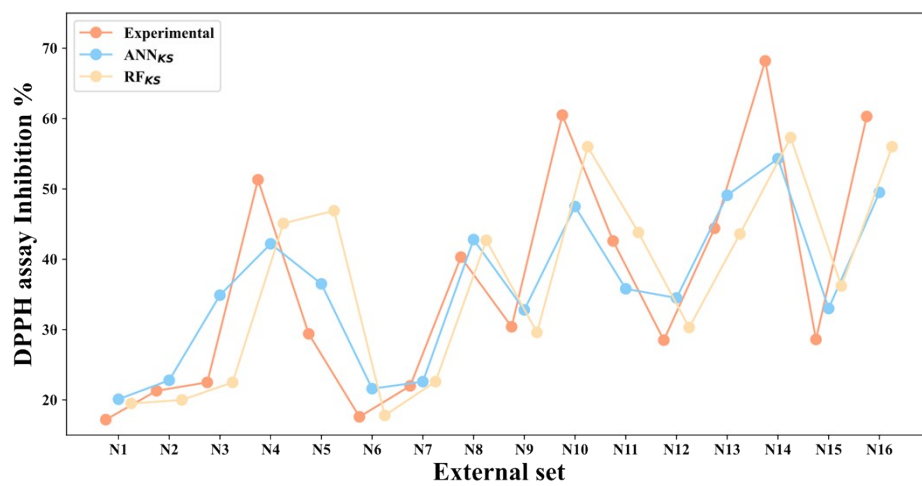

**Table S6.** Five molecular descriptors of 16 new NSAIDs-Se derivatives.

| No. | E-state keys<br>(sums): S_dssC | E-state keys<br>(sums):<br>S_sCH3 | Dipole y | HOMO<br>eigenvalue | Heat of<br>formation |
|-----|--------------------------------|-----------------------------------|----------|--------------------|----------------------|
| N1  | 0.051                          | 6.379                             | 1.066    | -7.554             | 333.633              |
| N2  | -0.122                         | 1.849                             | -1.415   | -7.582             | 518.979              |
| N3  | 0.015                          | 3.591                             | 6.948    | -7.562             | 411.175              |
| N4  | -0.330                         | 0.000                             | -3.88    | -7.627             | 395.215              |
| N5  | -0.134                         | 1.785                             | 4.661    | -7.670             | 448.962              |
| N6  | 3.451                          | 4.537                             | 3.214    | -7.532             | 405.688              |
| N7  | -0.105                         | 4.157                             | 4.715    | -7.522             | 484.389              |
| N8  | 0.407                          | 1.922                             | 1.594    | -7.645             | 370.181              |
| N9  | 0.649                          | 7.964                             | 1.122    | -7.681             | 305.544              |
| N10 | 0.440                          | 3.422                             | 1.589    | -7.628             | 486.253              |
| N11 | 0.604                          | 5.174                             | -3.538   | -7.594             | 379.411              |
| N12 | 0.191                          | 1.544                             | 4.725    | -7.630             | 366.458              |
| N13 | 0.428                          | 3.351                             | 1.624    | -7.768             | 410.715              |
| N14 | 2.958                          | 5.865                             | -0.862   | -7.451             | 372.215              |
| N15 | 0.479                          | 5.741                             | 0.724    | -7.642             | 474.437              |
| N16 | 0.987                          | 3.506                             | 1.427    | -7.758             | 338.760              |

## Code S1. Python codes optimization of the QSAR models

### Generate RF Model from Dataset Split by KS

```
# Read the CSV file
da = pd.read_csv('/Users/pipi/54-5des.csv')

# Split the data into training (train), testing (test), and external (ext) sets
train = da.head(28)
test = da.iloc[28:36]
ext = da.tail(16)

# Define the target columns
y0_kstrain = train.iloc[:, 0]
y0_kstest = test.iloc[:, 0]
y0_ksext = ext.iloc[:, 0]

# Define the feature columns for Random Forest
X_train_rf = train.iloc[:, 2:]
X_test_rf = test.iloc[:, 2:]
X_ext_rf = ext.iloc[:, 2:]

# Define the hyperparameters to be tested for Random Forest
param_grid_rf = {
    'n_estimators': [30, 50, 70, 90],
    'max_depth': [11, 12, 13, 14, 15],
    'min_samples_split': [1, 2, 3],
    'min_samples_leaf': [1, 2, 3]}
rf_model = RandomForestRegressor()

# Use GridSearchCV to search for the best hyperparameter combination
grid_search_rf = GridSearchCV(estimator=rf_model, param_grid=param_grid_rf,
                              scoring='neg_mean_squared_error', cv=5)
grid_search_rf.fit(X_train_rf, y0_kstrain)

# Get the best hyperparameters from the grid search
best_params_rf = grid_search_rf.best_params_

# Train a Random Forest model with the best hyperparameters
best_rf_model = RandomForestRegressor(**best_params_rf)

# Internal validation using leave-one-out cross-validation
from sklearn.model_selection import LeaveOneOut

loo = LeaveOneOut()

# Initialize a list to store predictions
y_pred_rf_loo = []

# Perform leave-one-out cross-validation
for train_index, test_index in loo.split(X_train_rf):
    X_train_loo, X_test_loo = X_train_rf.iloc[train_index], X_train_rf.iloc[test_index]
    y_train_loo, y_test_loo = y0_kstrain.iloc[train_index], y0_kstrain.iloc[test_index]

    # Train a Random Forest model
    rf_model_loo = RandomForestRegressor(**best_params_rf)
    rf_model_loo.fit(X_train_loo, y_train_loo)

    # Make predictions on the left-out sample
    y_pred_loo = rf_model_loo.predict(X_test_loo)

    # Store the prediction
    y_pred_rf_loo.extend(y_pred_loo)

# Store leave-one-out predictions in the DataFrame
KS_rf['Predicted Values (LOO)'] = y_pred_rf_loo

# Evaluate the model performance on leave-one-out cross-validation
r2_rf_loo = r2_score(y0_rmtrain, y_pred_rf_loo)
rmse_rf_loo = np.sqrt(mean_squared_error(y0_rmtrain, y_pred_rf_loo))

# Output results for leave-one-out cross-validation
print("\nRandom Forest Performance on Leave-One-Out Cross-Validation:")
print("R^2:", r2_rf_loo)
print("RMSE:", rmse_rf_loo)

best_rf_model.fit(X_train_rf, y0_kstrain)

# Make predictions on the test set
y_pred_rf_test = best_rf_model.predict(X_test_rf)

# Evaluate the model performance on the test set
r2_rf_test = r2_score(y0_kstest, y_pred_rf_test)
rmse_rf_test = np.sqrt(mean_squared_error(y0_kstest, y_pred_rf_test))
```



```
# Make predictions on the external set
y_pred_rf_ext = best_rf_model.predict(X_ext_rf)

# Evaluate the model performance on the external set
r2_rf_ext = r2_score(y0_ksext, y_pred_rf_ext)
rmse_rf_ext = np.sqrt(mean_squared_error(y0_ksext, y_pred_rf_ext))

# Output results
print("Best Hyperparameters (Random Forest):", best_params_rf)
print("\nRandom Forest Performance on Test Set:")
print("R^2:", r2_rf_test)
print("RMSE:", rmse_rf_test)

print("\nRandom Forest Performance on External Set:")
print("R^2:", r2_rf_ext)
print("RMSE:", rmse_rf_ext)

# Output the DataFrame with predictions and true values
print("KS_RF DataFrame:")
print(KS_rf)
```

## Generate RF Model from Dataset Split by RM

```
da = pd.read_csv('/Users/pipi/54-5des.csv')
# Split the data into training (train), testing (test), and external (ext) sets
train = da.head(28)
test = da.iloc[28:36]
ext = da.tail(16)
# Define the target columns
y0_rmtrain = train.iloc[:, 1]
y0_rmtest = test.iloc[:, 1]
y0_rmext = ext.iloc[:, 1]
# Define the feature columns for Random Forest
X_train_rf = train.iloc[:, 2:]
X_test_rf = test.iloc[:, 2:]
X_ext_rf = ext.iloc[:, 2:]
# Define the hyperparameters to be tested for Random Forest
param_grid_rf = {
    'n_estimators': [30, 50, 70, 90],
    'max_depth': [11, 12, 13, 14, 15],
    'min_samples_split': [1, 2, 3],
    'min_samples_leaf': [1, 2, 3]}
# Initialize the Random Forest model
rf_model = RandomForestRegressor()
# Use GridSearchCV to search for the best hyperparameter combination
grid_search_rf = GridSearchCV(estimator=rf_model, param_grid=param_grid_rf,
                              scoring='neg_mean_squared_error', cv=5)
grid_search_rf.fit(X_train_rf, y0_rmtrain)

# Get the best hyperparameters from the grid search
best_params_rf = grid_search_rf.best_params_

# Train a Random Forest model with the best hyperparameters
best_rf_model = RandomForestRegressor(**best_params_rf)

# Internal validation using leave-one-out cross-validation
from sklearn.model_selection import LeaveOneOut

loo = LeaveOneOut()

# Initialize a list to store predictions
y_pred_rf_loo = []
# Perform leave-one-out cross-validation
for train_index, test_index in loo.split(X_train_rf):
    X_train_loo, X_test_loo = X_train_rf.iloc[train_index], X_train_rf.iloc[test_index]
    y_train_loo, y_test_loo = y0_rmtrain.iloc[train_index], y0_rmtrain.iloc[test_index]

    # Train a Random Forest model
    rf_model_loo = RandomForestRegressor(**best_params_rf)
    rf_model_loo.fit(X_train_loo, y_train_loo)

    # Make predictions on the left-out sample
    y_pred_loo = rf_model_loo.predict(X_test_loo)

    # Store the prediction
    y_pred_rf_loo.extend(y_pred_loo)

# Store leave-one-out predictions in the DataFrame
rm_rf['Predicted Values (LOO)'] = y_pred_rf_loo

# Evaluate the model performance on leave-one-out cross-validation
r2_rf_loo = r2_score(y0_rmtrain, y_pred_rf_loo)
rmse_rf_loo = np.sqrt(mean_squared_error(y0_rmtrain, y_pred_rf_loo))

# Output results for leave-one-out cross-validation
print("\nRandom Forest Performance on Leave-One-Out Cross-Validation:")
print("R^2:", r2_rf_loo)
print("RMSE:", rmse_rf_loo)
```

```

best_rf_model.fit(X_train_rf, y0_rmtrain)

# Make predictions on the test set
y_pred_rf_test = best_rf_model.predict(X_test_rf)

# Evaluate the model performance on the test set
r2_rf_test = r2_score(y0_rmtest, y_pred_rf_test)
rmse_rf_test = np.sqrt(mean_squared_error(y0_rmtest, y_pred_rf_test))

# Make predictions on the external set
y_pred_rf_ext = best_rf_model.predict(X_ext_rf)

# Evaluate the model performance on the external set
r2_rf_ext = r2_score(y0_rmext, y_pred_rf_ext)
rmse_rf_ext = np.sqrt(mean_squared_error(y0_rmext, y_pred_rf_ext))

# Output results
print("Best Hyperparameters (Random Forest):", best_params_rf)
print("\nRandom Forest Performance on Test Set:")
print("R^2:", r2_rf_test)
print("RMSE:", rmse_rf_test)

print("\nRandom Forest Performance on External Set:")
print("R^2:", r2_rf_ext)
print("RMSE:", rmse_rf_ext)

# Output the DataFrame with predictions and true values
print("rm_RF DataFrame:")
print(rm_rf)

```

## Generate ANN Model from Dataset Split by KS

```
from sklearn.neural_network import MLPRegressor
from sklearn.model_selection import GridSearchCV, cross_val_predict, LeaveOneOut
from sklearn.metrics import mean_squared_error, r2_score
da = pd.read_csv('/Users/pipi/54-5des.csv')
# Split the data into training (train), testing (test), and external (ext) sets
train = da.head(28)
test = da.iloc[28:36]
ext = da.tail(16)
# Define the target columns
y0_kstrain = train.iloc[:, 0]
y0_kstest = test.iloc[:, 0]
y0_ksext = ext.iloc[:, 0]
# Define the feature columns for Artificial Neural Network (ANN)
X_train_ann = train.iloc[:, 2:]
X_test_ann = test.iloc[:, 2:]
X_ext_ann = ext.iloc[:, 2:]

# Define the DataFrame to store predictions and true values
KS_ANN = pd.DataFrame()

# Define the hyperparameters to be tested for ANN
param_grid_ann = {
    'hidden_layer_sizes': [(i,) for i in range(2, 9)], # 1 to 3 hidden layers
    'learning_rate_init': [0.01, 0.05, 0.1], # initial learning rate
    'batch_size': [4, 8, 16, 32],
    'max_iter': [600, 900, 1200, 1500]}
ann_model = MLPRegressor()

# Use GridSearchCV to search for the best hyperparameter combination with 5-fold cross-validation
grid_search_ann = GridSearchCV(estimator=ann_model, param_grid=param_grid_ann,
                               scoring='neg_mean_squared_error', cv=5)
grid_search_ann.fit(X_train_ann, y0_ks
                   train)

# Get the best hyperparameters from the grid search
best_params_ann = grid_search_ann.best_params_

# Train an ANN model with the best hyperparameters
best_ann_model = MLPRegressor(**best_params_ann)

# Internal validation using leave-one-out cross-validation
loo = LeaveOneOut()

# Initialize a list to store predictions
y_pred_ann_loo = []

# Perform leave-one-out cross-validation
for train_index, test_index in loo.split(X_train_ann):
    X_train_loo, X_test_loo = X_train_ann.iloc[train_index], X_train_ann.iloc[test_index]
    y_train_loo, y_test_loo = y0_kstrain.iloc[train_index], y0_kstrain.iloc[test_index]

    # Train an ANN model
    ann_model_loo = MLPRegressor(**best_params_ann)
    ann_model_loo.fit(X_train_loo, y_train_loo)

    # Make predictions on the left-out sample
    y_pred_loo = ann_model_loo.predict(X_test_loo)

    # Store the prediction
    y_pred_ann_loo.extend(y_pred_loo)

# Store leave-one-out predictions in the DataFrame
KS_ANN['Predicted Values (L00)'] = y_pred_ann_loo

# Evaluate the model performance on leave-one-out cross-validation
r2_ann_loo = r2_score(y0_kstrain, y_pred_ann_loo)
rmse_ann_loo = np.sqrt(mean_squared_error(y0_kstrain, y_pred_ann_loo))

# Make predictions on the test set
y_pred_ann_test = ann_model_loo.predict(X_test_ann)

# Store predictions and true values in the DataFrame
KS_ANN['True Values'] = y0_kstest
KS_ANN['Predicted Values (ANN)'] = y_pred_ann_test
```

```

# Evaluate the model performance on the test set
r2_ann_test = r2_score(y0_kstest, y_pred_ann_test)
rmse_ann_test = np.sqrt(mean_squared_error(y0_kstest, y_pred_ann_test))

# Make predictions on the external set
y_pred_ann_ext = ann_model_loo.predict(X_ext_ann)

# Store external set predictions in the DataFrame
KS_ANN['Predicted Values (ANN External)'] = y_pred_ann_ext

# Evaluate the model performance on the external set
r2_ann_ext = r2_score(y0_ksext, y_pred_ann_ext)
rmse_ann_ext = np.sqrt(mean_squared_error(y0_ksext, y_pred_ann_ext))

# Output the DataFrame with predictions and true values
print("KS_ANN DataFrame:")
print(KS_ANN)

# Output results
print("\nBest Hyperparameters (ANN):", best_params_ann)
print("\nANN Performance on Leave-One-Out Cross-Validation:")
print("R^2:", r2_ann_loo)
print("RMSE:", rmse_ann_loo)

print("\nANN Performance on Test Set:")
print("R^2:", r2_ann_test)
print("RMSE:", rmse_ann_test)

print("\nANN Performance on External Set:")
print("R^2:", r2_ann_ext)
print("RMSE:", rmse_ann_ext)

```

## Generate ANN Model from Dataset Split by RM

```
import pandas as pd
from sklearn.neural_network import MLPRegressor
from sklearn.model_selection import GridSearchCV, cross_val_predict, LeaveOneOut
from sklearn.metrics import mean_squared_error, r2_score
# Read the CSV file
da = pd.read_csv('/Users/pipi/54-5des.csv')
# Split the data into training (train), testing (test), and external (ext) sets
train = da.head(28)
test = da.iloc[28:36]
ext = da.tail(16)
# Define the target columns
y0_rmtrain = train.iloc[:, 1]
y0_rmtest = test.iloc[:, 1]
y0_rmext = ext.iloc[:, 1]
# Define the feature columns for Artificial Neural Network (ANN)
X_train_ann = train.iloc[:, 2:]
X_test_ann = test.iloc[:, 2:]
X_ext_ann = ext.iloc[:, 2:]
# Define the DataFrame to store predictions and true values
KS_ANN = pd.DataFrame()

# Define the hyperparameters to be tested for ANN
param_grid_ann = {
    'hidden_layer_sizes': [(i,) for i in range(2, 9)], # 1 to 3 hidden layers
    'learning_rate_init': [0.01, 0.05, 0.1], # initial learning rate
    'batch_size': [4, 8, 16, 32],
    'max_iter': [600, 900, 1200, 1500]
}

# Initialize the ANN model
ann_model = MLPRegressor()

# Use GridSearchCV to search for the best hyperparameter combination with 5-fold cross-validation
grid_search_ann = GridSearchCV(estimator=ann_model, param_grid=param_grid_ann,
                               scoring='neg_mean_squared_error', cv=5)
grid_search_ann.fit(X_train_ann, y0_kstrain)
# Get the best hyperparameters from the grid search
best_params_ann = grid_search_ann.best_params_
# Train an ANN model with the best hyperparameters
best_ann_model = MLPRegressor(**best_params_ann)
# Internal validation using leave-one-out cross-validation
loo = LeaveOneOut()
# Initialize a list to store predictions
y_pred_ann_loo = []

# Perform leave-one-out cross-validation
for train_index, test_index in loo.split(X_train_ann):
    X_train_loo, X_test_loo = X_train_ann.iloc[train_index], X_train_ann.iloc[test_index]
    y_train_loo, y_test_loo = y0_rmtrain.iloc[train_index], y0_rmtrain.iloc[test_index]

    # Train an ANN model
    ann_model_loo = MLPRegressor(**best_params_ann)
    ann_model_loo.fit(X_train_loo, y_train_loo)

    # Make predictions on the left-out sample
    y_pred_loo = ann_model_loo.predict(X_test_loo)

    # Store the prediction
    y_pred_ann_loo.extend(y_pred_loo)

# Store leave-one-out predictions in the DataFrame
RM_ANN['Predicted Values (LOO)'] = y_pred_ann_loo

# Evaluate the model performance on leave-one-out cross-validation
r2_ann_loo = r2_score(y0_kstrain, y_pred_ann_loo)
rmse_ann_loo = np.sqrt(mean_squared_error(y0_kstrain, y_pred_ann_loo))

# Make predictions on the test set
y_pred_ann_test = ann_model_loo.predict(X_test_ann)

# Store predictions and true values in the DataFrame
KS_ANN['True Values'] = y0_kstest
KS_ANN['Predicted Values (ANN)'] = y_pred_ann_test

# Evaluate the model performance on the test set
r2_ann_test = r2_score(y0_kstest, y_pred_ann_test)
rmse_ann_test = np.sqrt(mean_squared_error(y0_kstest, y_pred_ann_test))
```

```

# Make predictions on the external set
y_pred_ann_ext = ann_model_loo.predict(X_ext_ann)

# Store external set predictions in the DataFrame
RM_ANN['Predicted Values (ANN External)'] = y_pred_ann_ext

# Evaluate the model performance on the external set
r2_ann_ext = r2_score(y0_rmext, y_pred_ann_ext)
rmse_ann_ext = np.sqrt(mean_squared_error(y0_rmext, y_pred_ann_ext))

# Output the DataFrame with predictions and true values
print("RM_ANN DataFrame:")
print(RM_ANN)

# Output results
print("\nBest Hyperparameters (ANN):", best_params_ann)
print("\nANN Performance on Leave-One-Out Cross-Validation:")
print("R^2:", r2_ann_loo)
print("RMSE:", rmse_ann_loo)

print("\nANN Performance on Test Set:")
print("R^2:", r2_ann_test)
print("RMSE:", rmse_ann_test)

print("\nANN Performance on External Set:")
print("R^2:", r2_ann_ext)
print("RMSE:", rmse_ann_ext)

```

## Y-scrambling Test

```
from sklearn.model_selection import GridSearchCV, cross_val_score
from sklearn.utils import shuffle
from sklearn.metrics import mean_squared_error, r2_score
import numpy as np

# Initialize lists to store results
r2_results = []
r2_cv_results = []
rmse_results = []

# Perform the Y-scrambling experiment 10 times
for _ in range(10):
    # Shuffle the target values to scramble the relationship with predictors
    y_scrambled = shuffle(train_Y, random_state=42)

    # Fit the best model to the scrambled data
    best_model.fit(train_X, y_scrambled)

    # Predict using the fitted model
    y_scrambled_pred = best_model.predict(train_X)

    # Calculate RMSE and R^2 for the scrambled predictions
    rmse = np.sqrt(mean_squared_error(y_scrambled, y_scrambled_pred))
    r2 = r2_score(y_scrambled, y_scrambled_pred)

    # Perform cross-validation and calculate the average R^2 score
    r2_cv_scores = cross_val_score(best_model, train_X, y_scrambled, cv=3, scoring='r2')
    r2_cv_avg = np.mean(r2_cv_scores)

    # Append the results to the respective lists
    rmse_results.append(rmse)
    r2_results.append(r2)
    r2_cv_results.append(r2_cv_avg)

# Print the results of the Y-scrambling experiment
print("Y-scrambling Experiment Results:")
print("R^2 Results: ", [f'{r2:.4f}' for r2 in r2_results])
print("R^2cv Results: ", [f'{r2_cv:.4f}' for r2_cv in r2_cv_results])
print("Average R^2: ", f'{np.mean(r2_results):.4f}')
print("Average R^2cv: ", f'{np.mean(r2_cv_results):.4f}')
```
